# Measuring changes in *Plasmodium falciparum* census population size in response to sequential malaria control interventions

Kathryn E. Tiedje<sup>1,2§</sup>, Qi Zhan<sup>3,4§</sup>, Shazia Ruybal-Pésantez<sup>2†</sup>, Gerry Tonkin-Hill<sup>2,5</sup>, Qixin He<sup>4†</sup>, Mun Hua Tan<sup>1</sup>, Dionne C. Argyropoulos<sup>1</sup>, Samantha L. Deed<sup>1,2</sup>, Anita Ghansah<sup>6</sup>, Oscar Bangre<sup>7</sup>, Abraham R. Oduro<sup>7</sup>, Kwadwo A. Koram<sup>8</sup>, Mercedes Pascual<sup>9,10</sup>, and Karen P. Day<sup>1,2</sup>

<sup>1</sup> Department of Microbiology and Immunology, Bio21 Institute and Peter Doherty Institute, The University of Melbourne; Melbourne, Australia

<sup>2</sup> School of BioSciences, Bio21 Institute, The University of Melbourne; Melbourne, Australia

<sup>3</sup> Committee on Genetics, Genomics and Systems Biology, The University of Chicago; Chicago, Illinois, USA

<sup>4</sup> Department of Ecology and Evolution, The University of Chicago; Chicago, Illinois, USA

<sup>5</sup> Bioinformatics Division, Walter and Eliza Hall Institute; Melbourne, Australia

<sup>6</sup> Department of Parasitology, Noguchi Memorial Institute for Medical Research, University of Ghana; Legon, Ghana

<sup>7</sup> Navrongo Health Research Centre, Ghana Health Service; Navrongo, Ghana

<sup>8</sup> Epidemiology Department, Noguchi Memorial Institute for Medical Research, University of Ghana; Legon, Ghana

<sup>9</sup> Department of Biology and Department of Environmental Sciences, New York University, New York, New York, USA

<sup>10</sup> Santa Fe Institute, Santa Fe, New Mexico, USA

† *Current affiliations*: Department of Infectious Disease Epidemiology and MRC Centre for Global Infectious Disease Analysis, School of Public Health, Imperial College London, United Kingdom

‡ *Current affiliation*: Department of Biological Sciences, Purdue University; West Lafayette, United States

§ These authors share first authorship

\* Corresponding Author: Karen P. Day, Department of Microbiology and Immunology, Bio21 Institute and Peter Doherty Institute, The University of Melbourne, 30 Flemington Road, Parkville, VIC, 3011, Australia. E-mail: [Karen.Day@unimelb.edu.au](mailto:Karen.Day@unimelb.edu.au), Phone: +613 8344 2377

**RUNNING TITLE:** Impact of IRS and SMC on census population size

## 37 ABSTRACT

38 Here we introduce a new endpoint “census population size” to evaluate the epidemiology and control of  
39 *Plasmodium falciparum* infections, where the parasite, rather than the infected human host, is the unit of  
40 measurement. To calculate census population size, we rely on a definition of parasite variation known as  
41 multiplicity of infection ( $MOI_{var}$ ), based on the hyper-diversity of the *var* multigene family. We present a  
42 Bayesian approach to estimate  $MOI_{var}$  from sequencing and counting the number of unique DBL $\alpha$  tags (or  
43 DBL $\alpha$  types) of *var* genes, and derive from it census population size by summation of  $MOI_{var}$  in the human  
44 population. We track changes in this parasite population size and structure through sequential malaria  
45 interventions by indoor residual spraying (IRS) and seasonal malaria chemoprevention (SMC) from 2012  
46 to 2017 in an area of high-seasonal malaria transmission in northern Ghana. Following IRS, which reduced  
47 transmission intensity by > 90% and decreased parasite prevalence by ~40-50%, significant reductions in  
48 *var* diversity,  $MOI_{var}$ , and population size were observed in ~2,000 humans across all ages. These changes,  
49 consistent with the loss of diverse parasite genomes, were short lived and 32-months after IRS was  
50 discontinued and SMC was introduced, *var* diversity and population size rebounded in all age groups  
51 except for the younger children (1-5 years) targeted by SMC. Despite major perturbations from IRS and  
52 SMC interventions, the parasite population remained very large and retained the *var* population genetic  
53 characteristics of a high-transmission system (high *var* diversity; low *var* repertoire similarity)  
54 demonstrating the resilience of *P. falciparum* to short-term interventions in high-burden countries of sub-  
55 Saharan Africa.

56

## 57 INTRODUCTION

58 Malaria in high-transmission endemic areas of sub-Saharan Africa (SSA) is characterised by vast diversity  
59 of the *Plasmodium falciparum* parasites from the perspective of antigenic variation (Chen et al., 2011; Day  
60 et al., 2017; Otto et al., 2019; Ruybal-Pesántez et al., 2022, 2017). As with other hosts of hyper-variable  
61 pathogens (Futse et al., 2008), children experiencing clinical episodes of malaria, eventually become  
62 immune to disease but not to infection. This results in a large reservoir of chronic asymptomatic infections,  
63 in hosts of all ages, sustaining transmission to mosquitos. Given the goal of malaria eradication by 2050,  
64 it is therefore of interest to examine how the parasite population changes following perturbation by major  
65 intervention efforts, both in terms of its size and underlying population genetics.

66

67 So, what do we mean by the parasite population size in the case of *P. falciparum* and how do we measure  
68 it? Parasite prevalence, detected by microscopy or more sensitive molecular diagnostics (e.g., PCR),  
69 describes the proportion of infected human hosts. Studies of *P. falciparum* genetic diversity have shown  
70 that the majority of people in high-transmission endemic areas harbour diverse multiclonal infections  
71 measured as the complexity or multiplicity of infection (MOI) (e.g., (Anderson et al., 2000; Paul et al.,  
72 1995; Smith et al., 1999; Sumner et al., 2021)) with complex population dynamics (Bruce et al., 2000;  
73 Farnert et al., 1997). These genetic data indicate much larger parasite population sizes than observed by  
74 prevalence of infection alone. Thus, from an ecological perspective, we can consider a human host as a  
75 patch carrying a number of “antigenically-distinct infections” of *P. falciparum*. The sum of these  
76 antigenically-distinct infections over all hosts provides us with a census of the parasite count of relevance  
77 to monitoring and evaluating malaria interventions. We refer to this census population size hereafter

78 simply as population size but make clear that this measure is distinct from effective population size ( $N_e$ )  
79 as measured by neutral variation.

80

81 Diversity of *P. falciparum* single copy surface antigen genes such as circumsporozoite protein (*csp*),  
82 merozoite surface protein 1 (*mSP1*) or 2 (*mSP2*), and apical membrane antigen 1 (*AMA1*) have each been  
83 widely used to measure MOI (e.g., (Falk et al., 2006; Lerch et al., 2017; Nelson et al., 2019)). They have  
84 become part of newer genetic panels (e.g., Paragon v1 (Tessema et al., 2020) and AMPLseq v1 (LaVerriere  
85 et al., 2022)) specifically for MOI determination. Typically, MOI is reported as the maximum number of  
86 alleles or single locus haplotypes present at the most diverse of these antigen-encoding loci rather than  
87 the number of unique multilocus haplotypes of these genes combined, as it is challenging to accurately  
88 reconstruct or phase these haplotypes in hosts with an MOI > 3 (Lerch et al., 2019). Each of these genes  
89 is under balancing selection with a few geographically-common haplotypes and many very rare haplotypes  
90 in moderate- to high-transmission settings (Markwalter et al., 2022; Sumner et al., 2021). Where there is  
91 a high probability of co-occurrence of two or more common single locus haplotypes in a host, genotyping  
92 each of these single copy antigen genes alone will underestimate MOI. Single nucleotide polymorphism  
93 (SNP) panels have been used to define the presence of multiclonal infections with limited reliability to  
94 estimate MOI for highly complex infections, typical in high transmission, even with the use of  
95 computational methods (Labbé et al., 2023).

96

97 As an alternative to genotyping single copy antigen genes and biallelic SNP panels to estimate MOI, we  
98 have proposed the use of a fingerprinting methodology known as *var*coding to genotype the hyper-diverse  
99 *var* multigene family (~50-60 *var* genes per haploid genome). This method employs a ~450bp region of a

100 *var* gene, known as a DBL $\alpha$  tag encoding the immunogenic Duffy-binding-like alpha (DBL $\alpha$ ) domain of  
101 PfEMP1 (*Plasmodium falciparum* erythrocyte membrane protein 1), the major surface antigen of the  
102 blood stages (Zhang and Deitsch, 2022). Bioinformatic analyses of a large database of exon 1 sequences  
103 of *var* genes showed a predominantly 1-to-1 DBL $\alpha$ -*var* relationship, such that each DBL $\alpha$  tag typically  
104 represents a unique *var* gene, especially in high transmission (Tan et al., 2023). The extensive diversity of  
105 DBL $\alpha$  tags together with the very low percentage of *var* genes shared between parasites (Chen et al.,  
106 2011; Day et al., 2017; Ruybal-Pesántez et al., 2022, 2017) facilitate measuring MOI by amplifying, pooling,  
107 sequencing, and counting the number of unique DBL $\alpha$  tags (or DBL $\alpha$  types) in a host (Ruybal-Pesántez et  
108 al., 2022; Tiedje et al., 2022). From a single PCR with degenerate primers and amplicon sequencing, the  
109 method specifically counts the most diverse DBL $\alpha$  types, designated non-upsA, per infection to arrive at  
110 a metric we call MOI<sub>*var*</sub>. It is not based on assigning haplotypes but exploits the fact that *var* repertoires  
111 are non-overlapping, especially in high transmission. Instead, it assumes a set number of non-upsA types  
112 per genome based on repeated sampling of 3D7 control isolates accounting for PCR sampling errors to  
113 calculate MOI<sub>*var*</sub> (Ghansah et al., 2023; Ruybal-Pesántez et al., 2022; Tiedje et al., 2022). Consequently,  
114 rather than looking at the diversity of a single copy antigen-encoding gene like *csp*, *msh2*, or *ama1* to  
115 calculate MOI, by *var*coding we are looking at sets of up to 45 non-upsA DBL $\alpha$  types per genome. Prior  
116 work has shown that *var*coding is more sensitive to measure MOI in high transmission where there is an  
117 extremely high prevalence of multiclonal infections that cannot be accurately phased with either biallelic  
118 SNP panels (Ghansah et al., 2023; Labbé et al., 2023; Tessema et al., 2020; Watson et al., 2021) or  
119 combinations of single copy antigen genes (Sumner et al., 2021).

120

121 Here we report an investigation of changes in parasite census population size and structure through two  
122 sequential malaria control interventions between 2012 and 2017 in Bongo District located in the Upper  
123 East Region of Ghana, one of the 12 highest burden countries in Africa (World Health Organization, 2022).  
124 We present a novel Bayesian modification to the published *var*coding approach (Ghansah et al., 2023;  
125 Ruybal-Pesántez et al., 2022; Tiedje et al., 2022) that takes into account under-sampling of non-upsA  
126 DBL $\alpha$  types in an isolate to estimate MOI<sub>*var*</sub> (Ruybal-Pesántez et al., 2022; Tiedje et al., 2022) and therefore  
127 population size. We document *P. falciparum* prevalence as well as *var* diversity and population structure  
128 from baseline in 2012 through a major perturbation by a short-term indoor residual spraying (IRS)  
129 campaign managed under operational conditions, which reduced transmission intensity by > 90% as  
130 measured by the entomological inoculation rate (EIR) and decreased parasite prevalence by ~40-50%  
131 (Tiedje et al., 2022). Next, we followed what happened to parasite population size more than two years  
132 after the IRS intervention was discontinued and seasonal malaria chemoprevention (SMC) was introduced  
133 for children between the ages of 3-59 months (i.e., < 5 years) (Wagman et al., 2018). Detectable changes  
134 in parasite population size were seen as a consequence of the IRS intervention but this quantity rapidly  
135 rebounded 32-months after the intervention ceased. Overall, throughout the IRS, SMC, and subsequent  
136 rebound, the parasite population in humans remained large in size and retained the *var* population  
137 genetic characteristics of high transmission (i.e., high *var* diversity, low *var* repertoire overlap),  
138 demonstrating the overall resilience of the species to survive significant short-term perturbations.

## 139 MATERIALS AND METHODS

### 140 Human subject ethical approval

141 The study was reviewed/approved by the ethics committees at the Navrongo Health Research Centre  
142 (Ghana), Noguchi Memorial Institute for Medical Research (Ghana), The University of Melbourne  
143 (Australia), and The University of Chicago (United States). Details on the study area, study population,  
144 inclusion/exclusion criteria, and data collection procedures have been previously described (Tiedje et al.,  
145 2022, 2017).

146

### 147 Study design and sample collection

148 Using an interrupted time-series study design, four age-stratified cross-sectional surveys of ~2,000  
149 participants per survey were undertaken to investigate the impacts of IRS and SMC in combination with  
150 long-lasting insecticidal nets (LLINs) impregnated with pyrethroids under operational conditions on the  
151 asymptomatic *P. falciparum* reservoir from two proximal catchment areas (i.e., Veaa/Gowrie and Soe, with  
152 a sampling area of ~60 km<sup>2</sup>) in Bongo District, Ghana (Tiedje et al., 2022, 2017) (Table supplement 1).  
153 Bongo District, located in the Upper East Region, is categorized as high-seasonal malaria transmission  
154 based on the World Health Organization's (WHO) "A Framework for Malaria Elimination" (WHO/GMP,  
155 2017) where *P. falciparum* prevalence was  $\geq 35\%$  at baseline in 2012 (Tiedje et al., 2022, 2017). These  
156 ~2,000 participants of all ages (1-97 years) represent ~15% of the total population that reside in these  
157 two catchment areas in Bongo (Tiedje et al., 2017). The four cross-sectional surveys were completed at  
158 the end of the wet season (i.e., high-transmission season) and the study can be separated into four distinct  
159 study time points: (1) October 2012 (Survey 1) prior to the IRS and SMC (i.e., baseline), (2) October 2014  
160 (Survey 2) two months after the second round of IRS (Actellic 50EC), (3) October 2015 (Survey 3) seven

161 months after the third round of IRS using a long-acting non-pyrethroid insecticide (Actellic 300CS) (Gogue  
162 et al., 2020; US President’s Malaria Initiative Africa IRS (AIRS) Project, 2016), and finally (4) October 2017  
163 (Survey 4) 32-months after the discontinuation of IRS, but during the deployment of SMC to all children  
164 3-59 months (i.e., < 5 years) (Figure 1). LLINs (i.e., PermaNet 2.0, Olyset, or DawaPlus 2.0) were mass  
165 distributed in Bongo District by the National Malaria Elimination Programme (NMEP)/Ghana Health  
166 Service (GHS) between 2010-2012 and again in 2016 following the discontinuation of IRS (Gogue et al.,  
167 2020; Tiedje et al., 2022; US Agency for International Development (USAID) Global Health Supply Chain  
168 Program, 2020). In addition, to maintain high coverage of LLINs between these campaigns continuous  
169 distribution was undertaken using routine services (i.e., antenatal clinics, school distributions,  
170 immunization visits, etc.) (Tiedje et al., 2022). Over the course of this study self-reported LLIN usage the  
171 previous night remained high across all age groups, from 89.1% in 2012 (pre-IRS), 83.5% in 2014 (during  
172 IRS), 90.6% in 2015 (post-IRS), to 96.8% in 2017 (SMC). Details on the study area, study population, and  
173 data collection procedures have been previously described (Tiedje et al., 2022, 2017).

174

### 175 **Details of the IRS and SMC interventions**

176 Starting in 2013, the AngloGold Ashanti Malaria Control Programme (AGAMal) in a public-private  
177 partnership with the Global Fund, scaled up IRS across all of the Upper East Region of northern Ghana  
178 (Gogue et al., 2020). As part of this initiative, three rounds of IRS with organophosphate formulations (i.e.,  
179 non-pyrethroid) were rolled out prior to the start of the wet season between 2013 and 2015 (Figure 1A)  
180 in Bongo District (Tiedje et al., 2022). Based on AGAMal’s operational reports, IRS coverage in Bongo  
181 District was 91.8% in Round 1, 95.6% in Round 2, and finally 96.6% in Round 3 (AGAMal, personal  
182 communication). To monitor the impact of the IRS on the local vector population, monthly entomological



183 collections were undertaken between February 2013 and September 2015 (Tiedje et al., 2022). Using  
184 these surveys, we observed that the monthly entomological inoculation rate (EIR) (infective  
185 bites/person/month (ib/p/m)), a measure of local transmission intensity, declined by > 90% at the peak of  
186 the wet season between August 2013 (pre-IRS) (EIR = 5.3 ib/p/m) and August 2015 (post-IRS) (EIR = 0.4  
187 ib/p/m) (Tiedje et al., 2022). Following the IRS, SMC was rolled out in the Upper East Region by the  
188 NMEP)/(GHS) starting in 2016 (Gogue et al., 2020) (Figure 1A). SMC is the intermittent administration of  
189 full treatment courses of an antimalarial to children between the ages of 3-59 months (i.e., < 5 years)  
190 (WHO, 2012). Like other countries, the SMC drug combination of choice in Ghana is amodiaquine plus  
191 sulfadoxine-pyrimethamine, which is administered at monthly intervals during the high-transmission  
192 season (i.e., wet season) (WHO, 2012). The goal of this age-targeted intervention is to both clear current  
193 malaria infections and prevent malarial illness by maintaining a therapeutic concentration of an  
194 antimalarial in blood over the period of greatest risk (i.e., high-transmission season). Reported SMC  
195 coverage in Bongo District was 92.6% in 2016 (two rounds between August – September 2016) and 94.6%  
196 in 2017 (four rounds between September – December 2017) (Gogue et al., 2020).

197

### 198 ***Var* genotyping and sequence analysis**

199 Genomic DNA was extracted from the dried blood spots for all participants with a confirmed microscopic  
200 asymptomatic *P. falciparum* infection (i.e., isolate) (2,572 isolates, Table supplement 2) using the QIAamp  
201 DNA mini kit (QIAGEN, USA) as previously described (Tiedje et al., 2017). For *var* genotyping or *var* coding,  
202 the sequence region within the *var* genes encoding the DBL $\alpha$  domains of PfEMP1 were amplified using a  
203 single-step PCR, pooled, and sequenced on an Illumina platform using the MiSeq 2 $\times$ 300bp paired-end  
204 protocol (Supplemental Methods, Figure supplement 1). The raw sequence data was then processed using

205 our previously published customized bioinformatic pipelines (Supplemental Methods, Figure supplement  
206 2). For additional information on the use of these bioinformatic pipelines a detailed tutorial is available  
207 (<https://github.com/UniMelb-Day-Lab/tutorialDBLalpha>).

208

209 DBL $\alpha$  sequencing data was obtained from 2,397 *P. falciparum* isolates (93.2%) (Table supplement 2). This  
210 genotyping success was acceptable given that we were working with low-density asymptomatic infections  
211 (Table supplement 1). Using a cut-off of  $\geq 20$  DBL $\alpha$  types, DBL $\alpha$  sequencing data was obtained from 2,099  
212 *P. falciparum* isolates (81.6%) with a total of 289,049 DBL $\alpha$  sequences and 53,238 unique DBL $\alpha$  types  
213 being identified in the study population (Table supplement 2). The median *P. falciparum* density was  $\sim 4$   
214 times higher for isolates with  $\geq 20$  DBL $\alpha$  types compared to those that gave no or  $< 20$  DBL $\alpha$  types (520  
215 [IQR: 200-1880] parasites/ $\mu$ L vs. 120 [IQR: 40-200] parasites/ $\mu$ L, respectively).

216

### 217 **DBL $\alpha$ type diversity**

218 We monitored the impacts of the sequential interventions (i.e., IRS and SMC) on diversity by measuring  
219 changes in the population genetics of DBL $\alpha$  types at the population level (i.e., *P. falciparum* reservoir).  
220 Diversity was monitored using two measures, DBL $\alpha$  type richness and DBL $\alpha$  type frequency. Richness was  
221 defined as the number of unique DBL $\alpha$  types observed (i.e., DBL $\alpha$  type pool size) in each survey or study  
222 time point (i.e., 2012, 2014, 2015, and 2017). DBL $\alpha$  type richness, however, does not provide any  
223 information about the relative frequencies of the different DBL $\alpha$  types in the population, as they are all  
224 weighted equally whether they are observed once or more frequently (e.g., observed in  $> 20$  isolates per  
225 survey). To further examine the impacts of the interventions on DBL $\alpha$  type diversity we also assessed the  
226 frequency of each unique DBL $\alpha$  type in 2012, 2014, 2015, and 2017. Here we defined DBL $\alpha$  type frequency

227 as the number of times (i.e., number of isolates) a DBL $\alpha$  type was observed in each survey. Both upsA and  
228 non-upsA DBL $\alpha$  type diversities were measured due to their different biological features, chromosomal  
229 positions (i.e., subtelomeric regions vs. internal or central regions), as well as population genetics (Falk et  
230 al., 2009; Gardner et al., 2002; Jensen et al., 2004; Kaestli et al., 2006; Kalmbach et al., 2010; Kraemer et  
231 al., 2007; Kraemer and Smith, 2006; Kyriacou et al., 2006; Lavstsen et al., 2003; Normark et al., 2007;  
232 Rottmann et al., 2006; Warimwe et al., 2012, 2009; Zhang and Deitsch, 2022). The proportions of upsA  
233 and non-upsA *var* genes in a repertoire or single genome have been defined as ~15-20% and ~80-85%,  
234 respectively, based on whole genome sequencing (Rask et al., 2010). The upsA and non-upsA DBL $\alpha$  type  
235 proportions were partitioned as expected in our analyses, with the median proportions at the repertoire  
236 level being comparable in 2012 (19% upsA and 81% non-upsA), 2014 (22% upsA and 78% non-upsA), 2015  
237 (21% upsA and 79% non-upsA), and 2017 (20% upsA and 80% non-upsA).

238

### 239 **Repertoire similarity as defined by pairwise type sharing**

240 To estimate genetic similarity between the DBL $\alpha$  repertoires (i.e., unique DBL $\alpha$  types identified in each  
241 isolate) identified from two isolates, pairwise type sharing (PTS) was calculated between all pairs of  
242 isolates in each survey as previously described (Barry et al., 2007). PTS, analogous to the Sørensen Index,  
243 is a similarity statistic to evaluate the proportion of DBL $\alpha$  types shared between two isolate repertoires  
244 (i.e., DBL $\alpha$  repertoire overlap) and ranges from 0 (i.e., no DBL $\alpha$  repertoire overlap) to 1 (i.e., identical DBL $\alpha$   
245 isolate repertoires), where < 0.50 = unrelated, 0.5 = recent recombinants/siblings, > 0.5 = related, and 1  
246 = clones. PTS is a measure of identity-by-state (IBS) used to assess repertoire similarity between isolates  
247 and is not used to infer inheritance from a recent common ancestor (i.e., identity-by-decent (IBD)) (Speed  
248 and Balding, 2015).

249

## 250 DBL $\alpha$ isolate repertoire size

251 For this study we have exploited the unique population structure of non-overlapping DBL $\alpha$  isolate  
252 repertoires to estimate isolate  $MOI_{var}$ . To calculate  $MOI_{var}$ , the non-upsA DBL $\alpha$  types were chosen since  
253 not only are they more diverse and less conserved between isolate repertoires (i.e., low median  $PTS_{non-}$   
254  $upsA \leq 0.020$ ) compared to the upsA DBL $\alpha$  types, but they have also been shown to have a more specific 1-  
255 to-1 relationship with a single *var* gene than upsA (Tan et al., 2023). The low to non-existent overlap of  
256 repertoires enables an estimation of MOI that relies on the number of non-upsA DBL $\alpha$  types sequenced  
257 from an individual's isolate (Ruybal-Pesántez et al., 2022; Tiedje et al., 2022). A constant repertoire size  
258 or number of DBL $\alpha$  types in a parasite genome can be used to convert the number of types sequenced in  
259 an isolate to estimate MOI (Ruybal-Pesántez et al., 2022; Tiedje et al., 2022). This approach, however,  
260 neglects the measurement error in this size introduced by targeted PCR and amplicon sequencing of *var*  
261 genes in an isolate.

262

## 263 Bayesian estimation of $MOI_{var}$ and associated census population size

264 Here, we extend the method to a Bayesian formulation and estimate the posterior distribution for each  
265 sampled individual for the probability of different MOI values. From individual posterior distributions, we  
266 can then obtain the estimated MOI frequency distribution for the population as a whole. The two pieces  
267 of information required for our approach are the measurement error and the prior distribution of MOI.  
268 The measurement error is simply the repertoire size distribution, that is, the distribution of the number  
269 of non-upsA DBL $\alpha$  types sequenced given  $MOI = 1$ , which is empirically available (Figure supplement 3  
270 (Labbé et al., 2023)). We refer to it as  $P(s \mid MOI = 1)$  where  $s$  here denotes repertoire size. More generally

271 when  $MOI \geq 1$ ,  $s$  denotes the number of non-upsA DBL $\alpha$  types sequenced or isolate size. The prior  
272 distribution of MOI refers to the belief we have for what the actual MOI distribution might look like at the  
273 population level before empirical evidence is taken into consideration. For example, the prior distribution  
274 of MOI is likely to centre around a higher value in high-transmission endemic areas than in low-  
275 transmission ones.

276

277 We can obtain  $P(s | MOI = m)$  from the serial convolution of the repertoire size distribution  $P(s | MOI =$   
278  $1)$  and  $P(s | MOI = m - 1)$ . Starting with the repertoire size distribution given a single infection, we can  
279 derive  $P(s | MOI = m)$  for  $m$  equal to 2,3,..., up until a maximum value of 20 (empirically determined), as  
280 follows:

$$P(s | MOI = m) = \sum_{x=L}^U P(x | MOI = 1) \times P(s - x | MOI = m - 1)$$

281

1.1

282 where  $L$  and  $U$  are the lower and upper limit for the repertoire size, 10 and 45 respectively from the  
283 empirical repertoire size distribution (Figure supplement 3 (Labbé et al., 2023)).

284

285 For simplicity, we begin with a uniform prior. We use Bayes' rule to derive a posterior distribution of  
286 MOI given a certain number of non-upsA DBL $\alpha$  types sequenced from an individual:

$$P(MOI = j | s) = \frac{P(s | MOI = j) \times P(MOI = j)}{\sum_{i=1}^k P(s | MOI = i) \times P(MOI = i)}$$

287

1.2

288 where  $k$  is the maximum value of MOI, here 20, as empirically determined.

289

290 To obtain the MOI distribution at the population level, we could either simply pool the maximum *a*  
291 *posteriori* MOI estimate for each sampled individual, or use a technique called mixture distribution. For  
292 the latter, we weighed each posterior MOI distribution for each sampled individual equally and sum over  
293 all posterior distributions at the individual level to derive the MOI distribution at the population level:

$$f(MOI = m) = \sum_{i=1}^n \frac{1}{n} P(MOI = m | s_i)$$

294 1.3

295 where *n* is the number of sampled individuals. These two approaches gave similar results for our empirical  
296 survey data as determined by the Kolmogorov-Smirnov Test. The obtained distance statistic is close to 0  
297 and the corresponding *p-value* is non-significant across all surveys, indicating that the two estimates were  
298 drawn from the same distribution (Table supplements 3 and 4). Additionally, the difference between the  
299 mean MOI values at the population level obtained from the two approaches is small (Table supplements  
300 3 and 4). Given this similarity, we present the results based on pooling the maximum *a posteriori* MOI  
301 estimates for each sampled individual in the main text and include the results based on mixture  
302 distribution in the Supplemental Information. Note that we focused on individuals who had confirmed  
303 microscopic asymptomatic *P. falciparum* infections for our MOI estimation.

304  
305 To examine alternative priors, we considered empirical MOI distributions described in the literature  
306 including the Poisson, hyper-Poisson, and negative binomial distributions (Dietz, 1988; Henry, 2020). The  
307 hyper-Poisson and negative binomial distributions can capture the overdispersion seen in the empirical  
308 distribution of MOI for certain areas and caused by factors such as heterogeneous biting. We therefore  
309 focused on a negative binomial distribution and investigated changing its parameters to generate priors  
310 with different means spanning a wide range of MOI values (mean MOI within [~1.5, ~6.7]), including those

311 seen in high-transmission endemic areas. A uniform prior and a zero-truncated negative binomial  
312 distribution with parameters within the range typical of high-transmission endemic regions (higher mean  
313 MOI, for example,  $\sim 4.3$  versus  $\sim 6.7$ , with tails for higher MOI values in the range of 10-20) produce similar  
314 MOI estimates at the population level (Table supplements 5 and 6). However, when setting the parameter  
315 range of the zero-truncated negative binomial to be representative of those in low-transmission endemic  
316 regions where the empirical MOI distribution centres around monoclonal infections with the majority of  
317 MOIs = 1 or 2 (mean MOI  $\approx 1.5$ , no tail at higher MOI values), the final population-level MOI distribution  
318 does deviate more from that based on the aforementioned prior and parameter choices (Table  
319 supplement 6). The final individual- and population-level MOI estimates are not sensitive to the specifics  
320 of the prior MOI distribution as long as this distribution captures the tail for higher MOI values with above-  
321 zero probability. The obtained Kolmogorov-Smirnov Test distance statistics and their corresponding  $p$ -  
322 values, the Pearson correlation tests and their corresponding  $p$ -values, as well as the difference in mean  
323 MOI values, for the comparison of the MOI estimates obtained with the different priors are included in  
324 Table supplements 5 and 6. Given these comparisons, we provide in our analyses the estimated  
325 population MOI distribution using a uniform prior.

326

### 327 **Statistical analysis**

328 We used the R v4.3.1 for all data analyses with the collection of R packages in *tidyverse* being used for  
329 data curation along with *base*, *stats*, *gtsummary*, and *epiR* for the statistical analyses (R Core Team, 2018;  
330 Sjoberg, D et al., 2021; Stevenson, 2020; Wickham et al., 2019). Continuous variables are presented as  
331 medians with interquartile ranges (IQRs) and discrete variables are presented using the observed or  
332 calculated values with the 95% confidence interval (95% CIs) or  $\pm 2$  standard deviations ( $\pm 2SD$ ). Kaplan-

333 Meier survival curves were generated for the time (i.e., number of surveys) to first event (i.e., when the  
334 DBL $\alpha$  type was no longer observed/detected) comparing the upsA and non-upsA DBL $\alpha$  types; *p-values*  
335 were determined using the log-rank test using the R packages *survival* and *survminer* (Kassambara et al.,  
336 2021; Therneau, 2023). The time interval to first event considered for all survival curves was the number  
337 of surveys or year (i.e., 2012, 2014, 2015, and 2017) that each DBL $\alpha$  type was observed and only includes  
338 those upsA (N = 2,218) and non-upsA (N = 33,159) DBL $\alpha$  types that were seen at baseline in 2012 (i.e.,  
339 those DBL $\alpha$  types observed prior to the IRS intervention) (Table supplement 2).

340



## 341 RESULTS

342 Between 2013 and 2015, three-rounds of IRS with non-pyrethroid insecticides were implemented across  
343 all of Bongo District. Coincident with the > 90% decrease in transmission following IRS (Tiedje et al., 2022),  
344 the prevalence of microscopic *P. falciparum* infections compared to the 2012 baseline survey (pre-IRS)  
345 declined by 45.2% and 35.7% following the second (2012 to 2014) and the third (2012 to 2015) round of  
346 IRS, respectively (Figure 1B, Table supplement 1). These declines in parasite prevalence were observed  
347 across all ages, with the greatest impacts being observed on the younger children (1-5 years) who were  
348 ~3 times less likely to have an infection in 2015 (post-IRS) compared to 2012 (pre-IRS) (Figure 1C, Table  
349 supplement 1). These reductions were however short-lived and in 2017, 32-months after the  
350 discontinuation of IRS, but during SMC, overall *P. falciparum* prevalence rebounded to 41.2%, or near pre-  
351 IRS levels (Figure 1B, Table supplement 1). Importantly, this increase in the prevalence of infection in 2017  
352 was only observed among the older age groups (i.e.,  $\geq 6$  years) (Figure 1C, Table supplement 1). This  
353 difference by age group in 2017 can be attributed to SMC, which only targets children between 3-59  
354 months (i.e., < 5 years). A notable increase in parasite prevalence for adolescents (11-20 years) and adults  
355 (> 20 years) was found in 2017 relative to the 2012 (pre-IRS) (Figure 1C, Table supplement 1).

356

357 Next, we wanted to explore changes in population size measured by  $MOI_{var}$ . As this metric is based on  
358 non-overlap of *var* repertoire diversity of individual isolates, specifically non-upsA DBL $\alpha$  types, we  
359 investigated whether DBL $\alpha$  isolate repertoire similarity (or overlap), as measured by PTS, increased  
360 following the sequential interventions (i.e., IRS and SMC). Figure 2 shows that median PTS values for both  
361 upsA and non-upsA DBL $\alpha$  types remained low in all surveys, although the PTS distributions for both groups  
362 changed significantly at each of the study time points relative to the 2012 baseline survey (pre-IRS) ( $p$ -

363 values  $< 0.001$ , Kruskal-Wallis test) (Figure 2). Somewhat unexpectedly, the change was in the direction  
364 of reduced similarity (i.e., less overlap) with lower median PTS scores and a larger number of isolates  
365 sharing no DBL $\alpha$  types (i.e., PTS = 0) in 2014, 2015, and 2017 compared to 2012. Relevant to measurement  
366 of  $MOI_{var}$ , the median PTS scores for non-upsA DBL $\alpha$  types were lower following the IRS intervention  
367 (PTS<sub>non-upsA</sub>: 2014 = 0.013 and 2015 = 0.013 vs. PTS<sub>non-upsA</sub>: 2012 = 0.020). In 2017, the non-upsA PTS  
368 distributions shifted back towards higher median PTS scores (PTS<sub>non-upsA</sub> = 0.016) and fewer isolates shared  
369 no DBL $\alpha$  types relative to 2014 and 2015 (Figure 2). To verify this pattern was not influenced by multiclonal  
370 infections ( $MOI_{var} > 1$ ) we also examined isolates with monoclonal infections ( $MOI_{var} = 1$ ) and found that  
371 this non-overlapping structure persisted regardless of infection complexity, particularly for the non-upsA  
372 DBL $\alpha$  types (Figure supplement 4). These PTS data make clear that we were dealing with a large, highly  
373 diverse parasite population where 99.9% of the isolate comparisons in all surveys had PTS<sub>non-upsA</sub> scores  $\leq$   
374 0.1 (i.e., shared  $\leq 10\%$  of their non-upsA DBL $\alpha$  types), indicating that DBL $\alpha$  isolate repertoires were highly  
375 unrelated (Figure 2). In fact, throughout the IRS, SMC, and subsequent rebound, very few DBL $\alpha$  isolate  
376 repertoires were observed to be related, with  $< 0.003\%$  isolate comparisons in each survey having a PTS<sub>non-</sub>  
377 upsA  $\geq 0.5$  (i.e., siblings or recent recombinants) (Figure 2).

378

379 The raw data of non-upsA DBL $\alpha$  isolate repertoire sizes (Figure supplement 5) were used to estimate  
380  $MOI_{var}$  as adjusted using the Bayesian approach based on pooling the maximum *a posteriori* MOI estimates  
381 (Figure 3) and the mixture distribution (Figure supplement 6). We observed that at baseline in 2012, the  
382 majority (89.2%) of the population across all ages carried multiclonal infections (median  $MOI_{var} = 4$  [IQR:  
383 2 – 6]) (Figure 3A). Following the IRS intervention, the estimated  $MOI_{var}$  distributions became more  
384 positively skewed, indicating that a lower proportion of participants harboured multiclonal infections with

385 a lower median  $MOI_{var}$  in 2014 (64.5%; median  $MOI_{var} = 2$  [IQR: 1 – 3]) and 2015 (71.4%; median  $MOI_{var} =$   
386 2 [IQR: 1 – 3]) compared to 2012 (Figure 3A). These reductions in median  $MOI_{var}$  and the proportion of  
387 multiclonal infections, which were observed across all age groups (Figure 3B), are consistent with the >  
388 90% decrease in transmission intensity following the IRS in turn reducing exposure to new parasite  
389 genomes. However, in 2017, both median  $MOI_{var}$  (3 [IQR: 2 – 4]) and the proportion of multiclonal  
390 infections (78.9%) rebounded in all age groups, even among the younger children (1-5 years)  
391 predominantly targeted by SMC (Figure 3). While the prevalence of infection in 2017 remained low for  
392 the younger children (1-5 years), those infected still carried multiclonal infections (84.1% of those  
393 infected) (Figure 3B). Although the  $MOI_{var}$  distributions across all age groups started to rebound in 2017  
394 (i.e., less positively skewed compared to 2014 and 2015) they had not fully recovered to the 2012 baseline  
395 patterns (Figure 3). This was most apparent among the younger children (1-5 years), as a larger proportion  
396 of isolates in 2017, compared to 2012, had  $MOI_{var}$  values equal to one or two, while a smaller proportion  
397 had  $MOI_{var}$  values  $\geq 5$  (Figure 3B).

398

399 Census population size, measured as the number of *P. falciparum var* repertoires circulating in the  
400 population during each survey, was estimated by summation of isolate  $MOI_{var}$  (Figure 4, Table supplement  
401 7). In 2014 during IRS, this number decreased by 72.5% relative to the 2012 baseline survey (pre-IRS)  
402 (Figure 4CE), whereas prevalence decreased by 54.5% (Figure 4CE). Although census population size  
403 increased slightly in 2015 relative to 2014 (Figure 4A), there were still 64.6% fewer *var* repertoires in the  
404 population compared to 2012 (Figure 4CE) in comparison to a 42.6% decrease in prevalence (Figure 4CE).  
405 Importantly this loss of *var* repertoires in 2014 and 2015 following the IRS intervention was seen for all  
406 age groups (Figure 4B), with the greatest overall reductions (> 85%) being observed for the younger

407 children (1-5 years) (Figure 4DF). However, in 2017, the number of diverse *var* repertoires in the  
408 population rebounded, more than doubling between 2015 and 2017 (Figure 4CE). This increase in the  
409 number of *var* repertoires was seen for all age groups in 2017, except for the younger children (1-5 years)  
410 where those up to 59 months were targeted by SMC (Figure 4BD). In fact, the greatest overall increase  
411 was observed for the adolescents (11-20 years), where the number of *var* repertoires in 2017 was ~1.4  
412 times higher compared to 2012 (Figure 4F). Similar trends in the number *var* repertoires were also  
413 observed for the older children (6-10 years) and adults (>20 years) in 2017, although the rebound was not  
414 as striking as that detected for the adolescents.

415

416 As census population size changed considerably during the sequential IRS and SMC interventions, we  
417 investigated how the removal or loss of *P. falciparum var* repertoires and subsequent rebound in 2017  
418 altered DBL $\alpha$  type richness, measured as the number of unique upsA and non-upsA DBL $\alpha$  types in the  
419 parasite population in each survey. Richness at baseline in 2012 (pre-IRS) was high with a large number of  
420 unique DBL $\alpha$  types (upsA = 2,218; non-upsA = 33,159) (Figure 5, Table supplement 2) and limited overlap  
421 of *var* repertoires (i.e., median  $PTS_{\text{non-upsA}} \leq 0.020$ ) seen in a relatively small study population of 685  
422 microscopically positive individuals (Figure 2). In 2014, as *P. falciparum* prevalence and census population  
423 size declined (Figure 4) so too did the number of DBL $\alpha$  types, resulting in a 32.2% and 55.3% reduction in  
424 richness for the upsA and non-upsA DBL $\alpha$  types, respectively, compared to 2012 (Figure 5, Table  
425 supplement 2). Again in 2015, as *P. falciparum* prevalence and population size remained low (Figure 4)  
426 DBL $\alpha$  type richness was still less than that observed in 2012 (24.6% and 46.0% reduction for upsA and  
427 non-upsA DBL $\alpha$  types, respectively) (Figure 5, Table supplement 2). Finally, in 2017, we found that upsA

428 and non-upsA DBL $\alpha$  type richness rebounded relative to 2014 and 2015, coincident with the increase in  
429 *P. falciparum* prevalence and census population size (Figure 4, Figure 5).

430

431 Given this reduction in DBL $\alpha$  type richness following the IRS intervention and subsequent rebound in 2017,  
432 we wanted to explore whether the loss of richness was influenced by the frequency of individual DBL $\alpha$   
433 types in the parasite population within and among surveys. To answer this, we defined the relative  
434 frequency of individual DBL $\alpha$  types in all isolates in each survey (Figure 6, Figure supplement 7). We  
435 discovered that individual upsA and non-upsA DBL $\alpha$  types were not all at equal frequencies within a survey  
436 and among surveys. They could be classified as frequent (i.e., observed in 11-20 or > 20 isolates), less  
437 frequent (i.e., observed in 2-10 isolates) or only seen once, at baseline in 2012 (Figure 6AB). In 2014 and  
438 2015, following IRS, there was a significant increase in the proportion of upsA and non-upsA DBL $\alpha$  types  
439 in the lower frequency categories ( $p$ -value < 0.001, Mann-Whitney U test), with all DBL $\alpha$  types becoming  
440 rarer in the population (Figure 6CD). This change can be attributed to the removal of *P. falciparum* var  
441 repertoires (Figure 4) with associated loss of upsA and non-upsA DBL $\alpha$  type richness (Figure 5), which  
442 disproportionately affected those DBL $\alpha$  types seen once. This shift to all DBL $\alpha$  types becoming rarer  
443 following IRS changed in 2017, where the proportion of DBL $\alpha$  types in the more frequent categories (i.e.,  
444 2-10, 11-20, or > 20 isolates) significantly increased while the proportion seen once decreased ( $p$ -values  
445 < 0.001, Mann-Whitney U tests) (Figure 6CD). Data in Figure 6 (A-D) pointed to a differential effect of the  
446 IRS intervention and subsequent rebound on the less frequent upsA and non-upsA DBL $\alpha$  types vs. those  
447 that were classified as frequent, where those DBL $\alpha$  types that were most frequent persisted longitudinally.

448

449 To explore this observation further we restricted the longitudinal analysis to those DBL $\alpha$  types from the  
450 baseline survey in 2012 (pre-IRS). We compared the probability of survival for the DBL $\alpha$  types identified  
451 at baseline in 2012 and found that the upsA DBL $\alpha$  types persisted significantly longer in the population  
452 relative to the non-upsA DBL $\alpha$  types ( $p < 0.001$ , log-rank test), despite the IRS intervention. The simple  
453 explanation being that although the upsA DBL $\alpha$  types had lower richness (Figure 5), a larger proportion  
454 was classified as frequent indicating that multiple copies existed in the population compared to the non-  
455 upsA DBL $\alpha$  types (Figure 6CD). Furthermore, when we examined survival using the frequency categories,  
456 the upsA and non-upsA DBL $\alpha$  types that were observed at multiple study time points (i.e., 2012, 2014,  
457 2015, and 2017), albeit in different isolate repertoires, were those that were most frequent (i.e., observed  
458 in 11-20 and >20 isolates) in the population at baseline in 2012 (Figure 6EF). As expected, the DBL $\alpha$  types  
459 that were only observed once in 2012, were significantly less likely to be seen longitudinally ( $p$ -value <  
460 0.001, log-rank test) (Figure 6EF). These differential changes in DBL $\alpha$  type richness with respect to rare vs.  
461 frequent DBL $\alpha$  types are a consequence of changes in census population size with interventions (Figure  
462 4) where each isolate repertoire is composed of many rare DBL $\alpha$  types as defined by PTS (Figure 2).

463

## 464 DISCUSSION

465 *P. falciparum* populations in high-transmission endemic areas in SSA, are characterised by extensive  
466 diversity, high rates of recombination, as well as frequent multiclonal infections. Here we defined census  
467 population size of *P. falciparum* to understand total parasite diversity in a human population and explore  
468 the age-specific efficacy of malaria interventions to reduce this metric in such areas as typified by Bongo,  
469 Ghana. Census population size proved more informative than parasite prevalence alone because it  
470 captures “within” host parasite population size as MOI, rather than using the infected host per se as a unit  
471 of population size. Whilst the concept of census population size is agnostic of how you measure MOI, the  
472 extensive DBL $\alpha$  isolate repertoire diversity presented makes a strong case for fingerprinting parasite  
473 isolates by *var* coding in high transmission. This is opposed to looking at allelic diversity of a single copy  
474 antigen gene, such as *csp*.

475  
476 Census population size is a total enumeration or count of infections in a given population sample and over  
477 a given time period in an ecological sense, distinct from the formal effective population size ( $N_e$ ) used in  
478 population genetics (Charlesworth, 2009). Given the low overlap between *var* repertoires of parasites  
479 observed in monoclonal infections (MOI = 1), the census population size calculated in Bongo, Ghana  
480 translates to a diversity of strains or repertoires. The distinction of census population size in terms of  
481 infection counts and effective population size from population genetics has been made before for  
482 pathogens, including the seasonal influenza virus and the measles virus (Bedford et al., 2011); it is also a  
483 distinction made in the ecological literature for non-pathogen populations (Palstra and Fraser, 2012). The  
484 census population size of a given population sample depends of course on sample size and was used here  
485 for comparisons across time of samples of the same depth (i.e., ~2,000 individuals). There is, however, a

486 simple map between census population size and mean MOI, as one can simply divide or multiply by the  
487 sample size, respectively, to convert between the two quantities (Table supplement 7). Therefore, one  
488 can extrapolate from the census population size of a given population sample to that of the whole  
489 population of local hosts to compare across studies that differ in sampling depth. What is needed for this  
490 extrapolation is a stable mean MOI relative to the sample size or sampling depth, which is indeed the case  
491 in this study (Figure supplement 8) and can be easily checked in other studies. Given the typical duration  
492 of infection, we expect our population size to be representative of a per-generation measure.

493

494 By *var*coding we identified a very large census parasite population size in a relatively small human  
495 population of ~2,000 individuals at baseline and captured age-specific changes in this metric in response  
496 to sequential malaria control interventions. IRS reduced the  $MOI_{var}$  parasite population size substantially  
497 with the greatest reductions (85%) seen in the younger children (1-5 years). More than two years after  
498 cessation of IRS, rebound in 2017 was rapid in all age groups, except for the younger children (1-5 years)  
499 where those up to 59 months were targeted by SMC. Population sizes in adolescents (11-20 years) and  
500 adults (> 20 years) showed they carried more infections in 2017 than at baseline in 2012. This is indicative  
501 of a loss of immunity during IRS which may relate to the observed loss of *var* richness, especially the many  
502 rare types. This warrants further investigation of changes in variant-specific immunity. During and  
503 following the IRS and SMC interventions, *var* diversity remained high and *var* repertoire overlap remained  
504 low, reflecting characteristic properties of high transmission and demonstrating the overall resilience of  
505 the species to survive significant short-term perturbations. Combining interventions and targeting older  
506 age groups or the whole community with chemoprevention would no doubt have a much greater impact  
507 on reducing the diversity of the reservoir of infection.



508

509 What was striking about the Bongo study was the speed with which rebound in  $MOI_{var}$  per person and  
510 census population size occurred, once the short-term IRS was discontinued. We looked for a potential  
511 explanation in our genetic data. PTS and population frequency data showed that many of the DBL $\alpha$  types  
512 occurred in multiple repertoires or genomes. This enabled the survival of these more frequent DBL $\alpha$  types  
513 through the interventions, facilitating rebound by maintenance of this diversity. The other notable  
514 population genetic result of our study was the failure to increase similarity (or relatedness by state) of *var*  
515 repertoires by reducing transmission by > 90% via IRS. From a baseline of a very large population size with  
516 very low overlap in repertoires you need outcrossing to create relatedness. However, this was less likely  
517 to happen due to reduced transmission as a result of IRS. Rebound, with associated increases in  
518 transmission, led to a small increase in *var* repertoire similarity. This is the opposite to what has been  
519 observed in areas of lower transmission under intense malaria control where the intensity of interventions  
520 led to increased genome similarity, as assessed by IBD, from a starting point of much lower genome  
521 diversity and greater relatedness (Daniels et al., 2015).

522

523 Our molecular approach to measure population size has been to sum  $MOI_{var}$  in individual hosts with  
524 microscopically-detectable infections. Like any diagnostic method there are limits to sensitivity and  
525 specificity, which can be more or less tolerated dependent upon the purpose of the study. Here we have  
526 looked at relative changes in population size with sequential interventions using an interrupted time series  
527 study design and observed changes by measuring  $MOI_{var}$ . We have accounted for missing DBL $\alpha$  type data  
528 where complete *var* repertoires may not have been sequenced using a Bayesian method based on  
529 empirical knowledge of the measurement error. This approach has conceptual relation to the Bayesian

530 approach by Johnson and Larremore (Johnson and Larremore, 2022) to estimate complete repertoire size  
531 of, and overlap between, monoclonal infections from incomplete sampling of DBL $\alpha$  types. Our  
532 measurement of population size based on  $MOI_{var}$  will be subject to other sampling errors which may in  
533 the end be more significant (discussed in detail in Labbé et al. (Labbé et al., 2023)). For example, low  
534 parasitemia typical of asymptomatic infections, small blood volumes, clinical status, and/or within host  
535 dynamics, including synchronicity, will all create sampling problems, but these are common to all  
536 measures of MOI.

537

538 Previously, we have drawn attention to the potential underestimation of the number of DBL $\alpha$  types of  
539 related parasites generated by a cross, when using *var* genotyping (Labbé et al., 2023). Such related  
540 parasites must be created frequently in high transmission due to extensive outcrossing (Babiker et al.,  
541 1994; Paul et al., 1995). Single clone genomics experiments using biallelic SNPs from whole genome  
542 sequencing data have also detected related parasites using IBD in clinical infections from humans in a  
543 high-transmission area of Malawi (Nkhoma et al., 2020). Here we have analysed low- to moderate-density,  
544 chronic, asymptomatic infections (see Table supplement 1) under strong immune selection in semi-  
545 immune hosts whom we have shown select against parasites with high PTS scores consistent with  
546 relatedness by descent (Day et al., 2017; He et al., 2018; Ruybal-Pesántez et al., 2022). When considering  
547 the importance of possible exclusion of parasites related by descent, the only sure way to detect such  
548 parasites in high transmission is by single cell genomics, a methodology of limited application to malaria  
549 surveillance due to practicality and cost of scale up. Again, the error from failure to sample infections  
550 related by descent must be weighed up against the issues of under-sampling as described above.

551

552 The Bayesian approach of the *var*coding method relies on the low or limiting similarity of *var* repertoires  
553 infecting individual human hosts. As such, it would appear to break down as the *var* repertoire overlap  
554 moves away from extremely low, and therefore, for locations with lower transmission intensity.  
555 Interestingly, this is not the case in the numerical simulations of Labbé et al. (Labbé et al., 2023), for a  
556 gradient of three transmission intensities, from high to low, with the original *var*coding method  
557 performing well across the gradient. This robustness of the method may arise from a nonlinear and fast  
558 transition from low to high overlap that is accompanied by MOI changing rapidly from primarily  
559 multiclonal (MOI > 1) to monoclonal (MOI = 1) infections. This matter needs to be investigated further in  
560 the future, including ways to extend the Bayesian approach to explicitly include the distribution of *var*  
561 repertoire overlap.

562

563 In summary, our findings provide parasite population insights into why rebound is the inevitable  
564 consequence of such short-term IRS interventions unless you simultaneously target the highly diverse,  
565 long-lived parasite population in humans, not just children < 5 years by SMC. Of potential translational  
566 significance for malaria molecular surveillance, we identify new metrics, especially  $MOI_{var}$  and census  
567 population size as well as *var* frequency category, informative to monitor and evaluate interventions in  
568 high-transmission areas with multiclonal infections and high rates of outcrossing. Such metrics could be  
569 used longitudinally to detect incremental gains of transmission-reducing interventions, including IRS,  
570 LLINs, and vaccines to perturb the high-transmission characteristics of the parasite population in humans  
571 in high-burden countries in SSA.

572

573 **ACKNOWLEDGMENTS.** This research was supported by Fogarty International Center at the National  
574 Institutes of Health through the joint NIH-NSF-NIFA Ecology and Evolution of Infectious Diseases award  
575 R01-TW009670 to K.A.K, M.P, and K.P.D; and the National Institute of Allergy and Infectious Diseases,  
576 National Institutes of Health through the joint NIH-NSF-NIFA Ecology and Evolution of Infectious Diseases  
577 award R01-AI149779 to A.R.O, K.A.K, M.P, and K.P.D. We wish to thank the participants, communities, and  
578 the Ghana Health Service in Bongo District, Ghana for their willingness to participate in this study. We  
579 would like to thank the field teams in Bongo for their technical assistance in the field, as well as the  
580 laboratory personnel at the Navrongo Health Research Centre for their expertise and for undertaking the  
581 sample collections and parasitological assessments.

582

## 583 REFERENCES

- 584 Anderson TJC, Haubold B, Williams JT, Estrada-Franco JG, Richardson L, Mollinedo R, Bockarie M, Mokili J,  
585 Mharakurwa S, French N, Whitworth J, Velez ID, Brockman AH, Nosten F, Ferreira MU, Day KP,  
586 Estrada-Franco JG, Richardson L, Mollinedo R, Bockarie M, Mokili J, Mharakurwa S, French N,  
587 Whitworth J, Velez ID, Brockman AH, Nosten F, Ferreira MU, Day KP. 2000. Microsatellite markers  
588 reveal a spectrum of population structures in the malaria parasite *Plasmodium falciparum*. *Mol Biol*  
589 *Evol* **17**:1467–1482. doi:10.1093/oxfordjournals.molbev.a026247
- 590 Babiker HA, Ranford-Cartwright LC, Currie D, Charlwood JD, Billingsley P, Teuscher T, Walliker D. 1994.  
591 Random mating in a natural population of the malaria parasite *Plasmodium falciparum*. *Parasitology*  
592 **109**:413–421. doi:10.1017/S0031182000080665
- 593 Barry AE, Leliwa-Sytek A, Tavul L, Imrie H, Migot-Nabias F, Brown SM, McVean GA V, Day KP. 2007.  
594 Population genomics of the immune evasion (var) genes of *Plasmodium falciparum*. *PLoS Pathog*  
595 **3**:e34. doi:10.1371/journal.ppat.0030034
- 596 Bedford T, Cobey S, Pascual M. 2011. Strength and tempo of selection revealed in viral gene genealogies.  
597 *BMC Evol Biol* **11**. doi:10.1186/1471-2148-11-220
- 598 Bruce MC, Galinski MR, Barnwell JW, Donnelly CA, Walmsley M, Alpers MP, Walliker D, Day KP. 2000.  
599 Genetic diversity and dynamics of *Plasmodium falciparum* and *P. vivax* populations in multiply  
600 infected children with asymptomatic malaria infections in Papua New Guinea. *Parasitology* **121** ( Pt  
601 **3**:257–272. doi:10.1017/S0031182099006356
- 602 Charlesworth B. 2009. Fundamental concepts in genetics: Effective population size and patterns of  
603 molecular evolution and variation. *Nat Rev Genet*. doi:10.1038/nrg2526
- 604 Chen DS, Barry AE, Leliwa-Sytek A, Smith T-AA, Peterson I, Brown SM, Migot-Nabias F, Deloron P, Kortok  
605 MM, Marsh K, Daily JP, Ndiaye D, Sarr O, Mboup S, Day KP. 2011. A molecular epidemiological study  
606 of var gene diversity to characterize the reservoir of *Plasmodium falciparum* in humans in Africa. *PLoS*  
607 *One* **6**:e16629. doi:10.1371/journal.pone.0016629
- 608 Daniels RF, Schaffner SF, Wenger E a., Proctor JL, Chang H-H, Wong W, Baro N, Ndiaye D, Fall FB, Ndiop  
609 M, Ba M, Milner D a., Taylor TE, Neafsey DE, Volkman SK, Eckhoff P a., Hartl DL, Wirth DF. 2015.  
610 Modeling malaria genomics reveals transmission decline and rebound in Senegal. *PNAS* **112**:7067–  
611 7072. doi:10.1073/pnas.1505691112
- 612 Day KP, Artzy-Randrup Y, Tiedje KE, Rougeron V, Chen DS, Rask TS, Rorick MM, Migot-Nabias F, Deloron  
613 P, Luty AJF, Pascual M. 2017. Evidence of Strain Structure in *Plasmodium falciparum* Var Gene  
614 Repertoires in Children from Gabon, West Africa. *PNAS* **114**:E4103–E4111.  
615 doi:10.1073/pnas.1613018114
- 616 Dietz K. 1988. Mathematical models for transmission and control of malaria. *Malaria: Principles and*  
617 *Practice of Malariology*.
- 618 Falk N, Kaestli M, Qi W, Ott M, Baea K, Cortés A, Beck H-P. 2009. Analysis of *Plasmodium falciparum* var  
619 genes expressed in children from Papua New Guinea. *Journal of infectious diseases* **200**:347–356.  
620 doi:10.1086/600071
- 621 Falk N, Maire N, Sama W, Owusu-Agyei S, Smith T, Beck HP, Felger I. 2006. Comparison of PCR-RFLP and  
622 genescan-based genotyping for analyzing infection dynamics of *Plasmodium falciparum*. *American*  
623 *Journal of Tropical Medicine and Hygiene* **74**:944–950.

- 624 Farnert A, Snounou G, Rooth I, Bjorkman A. 1997. Daily dynamics of *Plasmodium falciparum*  
625 subpopulations in asymptomatic children in a holoendemic area. *American Journal of Tropical*  
626 *Medicine and Hygiene* **56**:538–547. doi:10.4269/ajtmh.1997.56.538
- 627 Futse JE, Brayton KA, Dark MJ, Knowles DP, Palmer GH. 2008. Superinfection as a driver of genomic  
628 diversification in antigenically variant pathogens. *Proc Natl Acad Sci U S A* **105**:2123–2127.  
629 doi:10.1073/pnas.0710333105
- 630 Gardner MJ, Hall N, Fung E, White O, Berriman M, Hyman RW, Carlton JM, Pain A, Nelson KE, Bowman S,  
631 Paulsen IT, James K, Eisen J a, Rutherford K, Salzberg SL, Craig A, Kyes S, Chan M-S, Nene V, Shallom  
632 SJ, Suh B, Peterson J, Angiuoli S, Pertea M, Allen J, Selengut J, Haft D, Mather MW, Vaidya AB, Martin  
633 DMA, Fairlamb AH, Fraunholz MJ, Roos DS, Ralph S a, McFadden GI, Cummings LM, Subramanian  
634 GM, Mungall C, Venter JC, Carucci DJ, Hoffman SL, Newbold C, Davis RW, Fraser CM, Barrell B. 2002.  
635 Genome sequence of the human malaria parasite *Plasmodium falciparum*. *Nature* **419**:498–511.  
636 doi:10.1038/nature01097
- 637 Ghansah A, Tiedje KE, Argyropoulos DC, Onwona CO, Deed SL, Labbé F, Oduro AR, Koram KA, Pascual M,  
638 Day KP. 2023. Comparison of molecular surveillance methods to assess changes in the population  
639 genetics of *Plasmodium falciparum* in high transmission. *Frontiers in Parasitology* **2**:1067966.
- 640 Gogue C, Wagman J, Tynuv K, Saibu A, Yihdego Y, Malm K, Mohamed W, Akplu W, Tagoe T, Ofosu A,  
641 Williams I, Asiedu S, Richardson J, Fornadel C, Slutsker L, Robertson M. 2020. An observational  
642 analysis of the impact of indoor residual spraying in Northern, Upper East, and Upper West Regions  
643 of Ghana: 2014 through 2017. *Malar J* **19**:1–13. doi:10.1186/s12936-020-03318-1
- 644 He Q, Pilosof S, Tiedje KE, Ruybal-Pesántez S, Artzy-Randrup Y, Baskerville EB, Day KP, Pascual M. 2018.  
645 Networks of genetic similarity reveal non-neutral processes shape strain structure in *Plasmodium*  
646 *falciparum*. *Nat Commun* **9**:1817. doi:10.1038/s41467-018-04219-3
- 647 Henry JM. 2020. A hybrid model for the effects of treatment and demography on malaria superinfection.  
648 *J Theor Biol* **491**:110194.
- 649 Jensen ATR, Magistrado P, Sharp S, Joergensen L, Lavstsen T, Chiucchiuini A, Salanti A, Vestergaard LS,  
650 Lusingu JP, Hermsen R, Sauerwein R, Christensen J, Nielsen MA, Hviid L, Sutherland C, Staalsoe T,  
651 Theander TG. 2004. *Plasmodium falciparum* associated with severe childhood malaria preferentially  
652 expresses PfEMP1 encoded by group A var genes. *J Exp Med* **199**:1179–1190.  
653 doi:10.1084/jem.20040274
- 654 Johnson EK, Larremore DB. 2022. Bayesian estimation of community size and overlap from random  
655 subsamples. *PLoS Comput Biol* **18**:1–16. doi:10.1371/journal.pcbi.1010451
- 656 Kaestli M, Cockburn I a, Cortés A, Baea K, Rowe JA, Beck H-P. 2006. Virulence of malaria is associated with  
657 differential expression of *Plasmodium falciparum* var gene subgroups in a case-control study. *J Infect*  
658 *Dis* **193**:1567–1574. doi:10.1086/503776
- 659 Kalmbach Y, Rottmann M, Kombila M, Kremsner PG, Beck H-P, Kun JFJ. 2010. Differential var gene  
660 expression in children with malaria and antitropic effects on host gene expression. *Journal of*  
661 *Infectious Diseases* **202**:313–317. doi:10.1086/653586
- 662 Kassambara A, Kosinski M, Biecek P, Scheipl F. 2021. survminer: Drawing Survival Curves using ggplot2.
- 663 Kraemer SM, Kyes SA, Aggarwal G, Springer AL, Nelson SO, Christodoulou Z, Smith LM, Wang W, Levin E,  
664 Newbold CI, Myler PJ, Smith JD. 2007. Patterns of gene recombination shape var gene repertoires in  
665 *Plasmodium falciparum*: comparisons of geographically diverse isolates. *BMC Genomics* **8**:45.  
666 doi:10.1186/1471-2164-8-45

- 667 Kraemer SM, Smith JD. 2006. A family affair: var genes, PfEMP1 binding, and malaria disease. *Curr Opin*  
668 *Microbiol*. doi:10.1016/j.mib.2006.06.006
- 669 Kyriacou HM, Stone GN, Challis RJ, Raza A, Lyke KE, Thera MA, Koné AK, Doumbo OK, Plowe C V., Rowe JA.  
670 2006. Differential var gene transcription in Plasmodium falciparum isolates from patients with  
671 cerebral malaria compared to hyperparasitaemia. *Mol Biochem Parasitol* **150**:211–218.  
672 doi:10.1016/j.molbiopara.2006.08.005
- 673 Labbé F, He Q, Zhan Q, Tiedje KE, Argyropoulos DC, Tan MH, Ghansah A, Day KP, Pascual M. 2023. Neutral  
674 vs . non-neutral genetic footprints of Plasmodium falciparum multiclonal infections. *PLoS Comput*  
675 *Biol* **19**:e1010816. doi:doi.org/10.1101/2022.06.27.497801
- 676 LaVerriere E, Schwabl P, Carrasquilla M, Taylor AR, Johnson ZM, Shieh M, Panchal R, Straub TJ, Kuzma R,  
677 Watson S, Buckee CO, Andrade CM, Portugal S, Crompton PD, Traore B, Rayner JC, Corredor V, James  
678 K, Cox H, Early AM, MacInnis BL, Neafsey DE. 2022. Design and implementation of multiplexed  
679 amplicon sequencing panels to serve genomic epidemiology of infectious disease: A malaria case  
680 study. *Mol Ecol Resour* 2285–2303. doi:10.1111/1755-0998.13622
- 681 Lavstsen T, Salanti A, Jensen ATR, Arnot DE, Theander TG. 2003. Sub-grouping of Plasmodium falciparum  
682 3D7 var genes based on sequence analysis of coding and non-coding regions. *Malar J* **2**:27.  
683 doi:10.1186/1475-2875-2-27
- 684 Lerch A, Koepfli C, Hofmann NE, Kattenberg JH, Rosanas-Urgell A, Betuela I, Mueller I, Felger I. 2019.  
685 Longitudinal tracking and quantification of individual Plasmodium falciparum clones in complex  
686 infections. *Sci Rep* **9**:1–8. doi:10.1038/s41598-019-39656-7
- 687 Lerch A, Koepfli C, Hofmann NE, Messerli C, Wilcox S, Kattenberg JH, Betuela I, O’Connor L, Mueller I,  
688 Felger I. 2017. Development of amplicon deep sequencing markers and data analysis pipeline for  
689 genotyping multi-clonal malaria infections. *BMC Genomics* **18**:1–13. doi:10.1186/s12864-017-4260-  
690 y
- 691 Markwalter CF, Menya D, Wesolowski A, Esimit D, Lokoel G, Kipkoech J, Freedman E, Sumner KM, Abel L,  
692 Ambani G, Meredith HR, Taylor SM, Obala AA, O’Meara WP. 2022. Plasmodium falciparum  
693 importation does not sustain malaria transmission in a semi-arid region of Kenya. *PLoS Global Public*  
694 *Health* **2**:e0000807. doi:10.1371/journal.pgph.0000807
- 695 Nelson CS, Sumner KM, Freedman E, Saelens JW, Obala AA, Mangeni JN, Taylor SM, O’Meara WP. 2019.  
696 High-resolution micro-epidemiology of parasite spatial and temporal dynamics in a high malaria  
697 transmission setting in Kenya. *Nat Commun* **10**. doi:10.1038/s41467-019-13578-4
- 698 Nkhoma SC, Trevino SG, Gorena KM, Nair S, Khoswe S, Jett C, Garcia R, Daniel B, Dia A, Terlouw DJ, Ward  
699 SA, Anderson TJC, Cheeseman IH. 2020. Co-transmission of Related Malaria Parasite Lineages Shapes  
700 Within-Host Parasite Diversity. *Cell Host Microbe* **27**:93-103.e4. doi:10.1016/j.chom.2019.12.001
- 701 Normark J, Nilsson D, Ribacke U, Winter G, Moll K, Wheelock CE, Bayarugaba J, Kironde F, Egwang TG,  
702 Chen Q, Andersson B, Wahlgren M. 2007. PfEMP1-DBL1alpha amino acid motifs in severe disease  
703 states of Plasmodium falciparum malaria. *Proc Natl Acad Sci U S A* **104**:15835–40.  
704 doi:10.1073/pnas.0610485104
- 705 Otto TD, Assefa SA, Böhme U, Sanders MJ, Kwiatkowski DP, Berriman M, Newbold C. 2019. Evolutionary  
706 analysis of the most polymorphic gene family in falciparum malaria. *Wellcome Open Res* **4**:1–29.  
707 doi:10.12688/wellcomeopenres.15590.1
- 708 Palstra FP, Fraser DJ. 2012. Effective/census population size ratio estimation: A compendium and  
709 appraisal. *Ecol Evol* **2**:2357–2365. doi:10.1002/ece3.329

- 710 Paul RE, Packer MJ, Walmsley M, Lagog M, Ranford-Cartwright LC, Paru R, Day KP. 1995. Mating patterns  
711 in malaria parasite populations of Papua New Guinea. *Science (1979)* **269**:1709–1711.
- 712 R Core Team. 2018. R: A Language and Environment for Statistical Computing. *R Foundation for Statistical*  
713 *Computing*.
- 714 Rask TS, Hansen D, Theander TG, Pedersen AG, Lavstsen T, Gorm Pedersen A, Lavstsen T, Pedersen AG,  
715 Lavstsen T, Gorm Pedersen A, Lavstsen T. 2010. Plasmodium falciparum erythrocyte membrane  
716 protein 1 diversity in seven genomes - divide and conquer. *PLoS Comput Biol* **6**:e1000933.  
717 doi:10.1371/journal.pcbi.1000933
- 718 Rottmann M, Lavstsen T, Mugasa JP, Kaestli M, Jensen ATR, Müller D, Theander T, Beck H-PP. 2006.  
719 Differential expression of var gene groups is associated with morbidity caused by Plasmodium  
720 falciparum infection in Tanzanian children. *Infect Immun* **74**:3904–3911. doi:10.1128/IAI.02073-05
- 721 Ruybal-Pesántez S, Tiedje KE, Pilosof S, Tonkin-Hill G, He Q, Rask TS, Amenga-Etego L, Oduro AR, Koram  
722 KA, Pascual M, Day KP. 2022. Age-specific patterns of DBL $\alpha$  var diversity can explain why residents of  
723 high malaria transmission areas remain susceptible to Plasmodium falciparum blood stage infection  
724 throughout life. *Int J Parasitol* **20**:721–731.
- 725 Ruybal-Pesántez S, Tiedje KE, Tonkin-Hill G, Rask TS, Kamya MR, Greenhouse B, Dorsey G, Duffy MF, Day  
726 KP. 2017. Population genomics of virulence genes of Plasmodium falciparum in clinical isolates from  
727 Uganda. *Sci Rep* **7**:11810. doi:10.1038/s41598-017-11814-9
- 728 Sjoberg, D, Whiting K, Curry M, Lavery J, Larmarange J. 2021. Reproducible Summary Tables with the  
729 gtsummary Package. *R J* **13**:570–580.
- 730 Smith T, Felger I, Fraser-Hurt N, Beck H-PP. 1999. Effect of insecticide-treated falciparum infections bed  
731 nets on the dynamics of multiple Plasmodium falciparum infections. *Trans R Soc Trop Med Hyg* **93**  
732 **(Supp)**:S1/53-S1/57. doi:10.1016/S0035-9203(99)90328-0
- 733 Speed D, Balding DJ. 2015. Relatedness in the post-genomic era: Is it still useful? *Nat Rev Genet* **16**:33–44.  
734 doi:10.1038/nrg3821
- 735 Stevenson M. 2020. epiR: Tools for the analysis of epidemiological data.
- 736 Sumner KM, Freedman E, Abel L, Obala A, Pence BW, Wesolowski A, Meshnick SR, Prudhomme-O’Meara  
737 W, Taylor SM. 2021. Genotyping cognate Plasmodium falciparum in humans and mosquitoes to  
738 estimate onward transmission of asymptomatic infections. *Nat Commun* **12**:1–12.  
739 doi:10.1038/s41467-021-21269-2
- 740 Tan MH, Shim H, Chan Y, Day KP. 2023. Unravelling chaos for malaria surveillance : Relationship between  
741 DBL $\alpha$  types and var genes in Plasmodium falciparum. *Frontiers in Parasitology* **1**.  
742 doi:https://doi.org/10.3389/fpara.2022.1006341
- 743 Tessema SK, Hathaway NJ, Teyssier NB, Murphy M, Chen A, Aydemir O, Duarte EM, Simone W, Colborn J,  
744 Saute F, Crawford E, Aide P, Bailey JA, Greenhouse B. 2020. Sensitive, highly multiplexed sequencing  
745 of microhaplotypes from the Plasmodium falciparum heterozygome. *Journal of Infectious Diseases*  
746 **225**:1227–1237.
- 747 Therneau T. 2023. A Package for Survival Analysis in R.
- 748 Tiedje KE, Oduro AR, Agongo G, Anyorigiya T, Azongo D, Awine T, Ghansah A, Pascual M, Koram KA, Day  
749 KP. 2017. Seasonal Variation in the Epidemiology of Asymptomatic Plasmodium falciparum Infections  
750 Across Two Catchment Areas in Bongo District, Ghana. *Am J Trop Med Hyg* **97**:199–212.  
751 doi:10.4269/ajtmh.16-0959
- 752 Tiedje KE, Oduro AR, Bangre O, Amenga-Etego L, Dadzie SK, Appawu MA, Frempong K, Asoala V, Charles  
753 A Narh, Samantha L Deed, Ruybal-Pesántez S, Argyropoulos DC, Anita Ghansah, Agyei SA, Segbaya S,



- 754 Desewu K, Williams I, Simpson JA, Malm K, Pascual M, Koram KA, Day KP. 2022. Indoor residual  
755 spraying with a non-pyrethroid insecticide reduces the reservoir of *Plasmodium falciparum* in a high-  
756 transmission area in northern Ghana. *PLOS Global Public Health* **2**:e0000285.  
757 doi:10.1371/journal.pgph.0000285
- 758 US Agency for International Development (USAID) Global Health Supply Chain Program. 2020. Technical  
759 Brief: Data visibility makes all the difference in Ghana's 2018 LLIN mass distribution campaign.
- 760 US President's Malaria Initiative Africa IRS (AIRS) Project. 2016. Entomological monitoring of the PMI AIRS  
761 program in northern Ghana: 2016 annual report. Bethesda, Marland, USA.
- 762 Wagman J, Gogue C, Tynuv K, Mihigo J, Bankineza E, Bah M, Diallo D, Saibu A, Richardson JH, Kone D,  
763 Fomba S, Bernson J, Steketee R, Slutsker L, Robertson M. 2018. An observational analysis of the  
764 impact of indoor residual spraying with non-pyrethroid insecticides on the incidence of malaria in  
765 Ségou Region, Mali: 2012–2015. *Malar J* **17**:19. doi:10.1186/s12936-017-2168-2
- 766 Warimwe GM, Fegan G, Musyoki JN, Newton CRJC, Opiyo M, Githinji G, Andisi C, Menza F, Kitsao B, Marsh  
767 K, Bull PC. 2012. Prognostic indicators of life-threatening malaria are associated with distinct parasite  
768 variant antigen profiles. *Sci Transl Med* **4**:129ra45. doi:10.1126/scitranslmed.3003247
- 769 Warimwe GM, Keane TM, Fegan G, Musyoki JN, Newton CRJC, Pain A, Berriman M, Marsh K, Bull PC. 2009.  
770 *Plasmodium falciparum* var gene expression is modified by host immunity. *Proc Natl Acad Sci U S A*  
771 **106**:21801–21806.
- 772 Watson OJ, Okell LC, Hellewell J, Slater HC, Unwin HJT, Omedo I, Bejon P, Snow RW, Noor AM, Rockett K,  
773 Hubbart C, Nankabirwa JI, Greenhouse B, Chang HH, Ghani AC, Verity R. 2021. Evaluating the  
774 Performance of Malaria Genetics for Inferring Changes in Transmission Intensity Using Transmission  
775 Modeling. *Mol Biol Evol* **38**:274–289. doi:10.1093/molbev/msaa225
- 776 WHO. 2012. WHO Policy Recommendation: Seasonal Malaria Chemoprevention (SMC) for *Plasmodium*  
777 *falciparum* malaria control in highly seasonal transmission areas of the Sahel sub-region in Africa.
- 778 WHO/GMP. 2017. A Framework for Malaria Elimination, Geneva World Health Organization.
- 779 Wickham H, Averick M, Bryan J, Chang W, McGowan L, François R, Golemund G, Hayes A, Henry L, Hester  
780 J, Kuhn M, Pedersen T, Miller E, Bache S, Müller K, Ooms J, Robinson D, Seidel D, Spinu V, Takahashi  
781 K, Vaughan D, Wilke C, Woo K, Yutani H. 2019. Welcome to the Tidyverse. *J Open Source Softw*  
782 **4**:1686. doi:10.21105/joss.01686
- 783 World Health Organization. 2022. World Malaria Report 2022, World Health Organization. doi:ISBN 978  
784 92 4 1564403
- 785 Zhang X, Deitsch KW. 2022. The mystery of persistent, asymptomatic *Plasmodium falciparum* infections.  
786 *Curr Opin Microbiol* **70**:102231. doi:10.1016/j.mib.2022.102231
- 787
- 788

789 **DATA AVAILABILITY STATEMENT.** The sequences utilized in this study are publicly available in GenBank  
790 under BioProject Number: PRJNA 396962. All data associated with this study are available in the main text,  
791 the Supporting Information, or upon reasonable request for research purposes to the corresponding  
792 author, Prof. Karen Day (karen.day@unimelb.edu.au). All custom code is available in an open source  
793 repository: (1) DBL $\alpha$ Cleaner pipeline is available at <https://github.com/UniMelb-Day-Lab/DBLaCleaner>, (2)  
794 clusterDBLalpha pipeline is available at <https://github.com/Unimelb-Day-Lab/clusterDBLalpha>, and the (3)  
795 classifyDBLalpha pipeline is available at <https://github.com/Unimelb-Day-Lab/classifyDBLalpha>. A dataset  
796 to demo this custom code is available at <https://github.com/UniMelb-Day-Lab/tutorialDBLalpha>. For  
797 additional information on the use of the Bayesian approach to estimate  $MOI_{var}$  please see  
798 <https://github.com/qzhan321/Bayesian-formulation-varcoding-MOI-estimation>.

799

800 **BENEFIT-SHARING STATEMENT.** A research collaboration was developed with scientists from Ghana  
801 based at the Navrongo Health Research Centre and the Noguchi Memorial Institute for Medical Research.  
802 All collaborators are included as co-authors and the relevant results from the research has been shared  
803 with key stakeholders and the local community (i.e., Paramount Chief of Bongo, divisional Chiefs, Queen  
804 Mothers, and community members), the Bongo District and Upper East Regional Health Directorates, as  
805 well as Ghana National Malaria Elimination Programme. Before this research was undertaken, informed  
806 consent was sought and obtained from the key stakeholders, traditional leadership, and the local  
807 community in Bongo District. In addition, members of the local community were trained as field workers  
808 and were directly involved in liaising with the community and in the collection of the study data. The  
809 contribution of these individuals to this research is described in the Acknowledgements. This research  
810 addresses a priority concern regarding malaria control and the impact of interventions. These concerns

811 are relevant for both the local community in Bongo District, as well as for the National Malaria Elimination  
812 Programme in Ghana.

813

814 **AUTHOR CONTRIBUTIONS.** K.P.D and M.P conceptualized the study of population size using  $MOI_{var}$ . K.A.K  
815 and K.P.D conceived and designed the field study with input from A.R.O and K.E.T, who together with O.B  
816 coordinated the field studies. K.E.T, S.R-P, and S.L.D processed the samples and performed the genotyping  
817 experiments. G.T-H developed and validated the bioinformatic pipelines. K.E.T, S.R-P, and D.C.A  
818 processed, cleaned, and curated the datasets for analysis. Q.Z developed and implemented the Bayesian  
819 estimations. K.E.T, Q.Z, M.P, and K.P.D analysed the data with contributions from S.R-P, Q.H, and M-H.T.  
820 K.E.T and Q.Z visualized the data. K.P.D, M.P, and K.E.T wrote the original draft of the manuscript. Q.Z.,  
821 S.R-P, G.T-H, Q.H, M-H.T, D.C.A, S.L.D, O. B, A.R.O, and K.AK reviewed and edited manuscript. M.P and K.P.D  
822 supervised the research. A.R.O, K.A.K, M.P, and K.P.D acquired the funding.

823

824 **COMPETING INTERESTS.** The authors declare no competing interests.

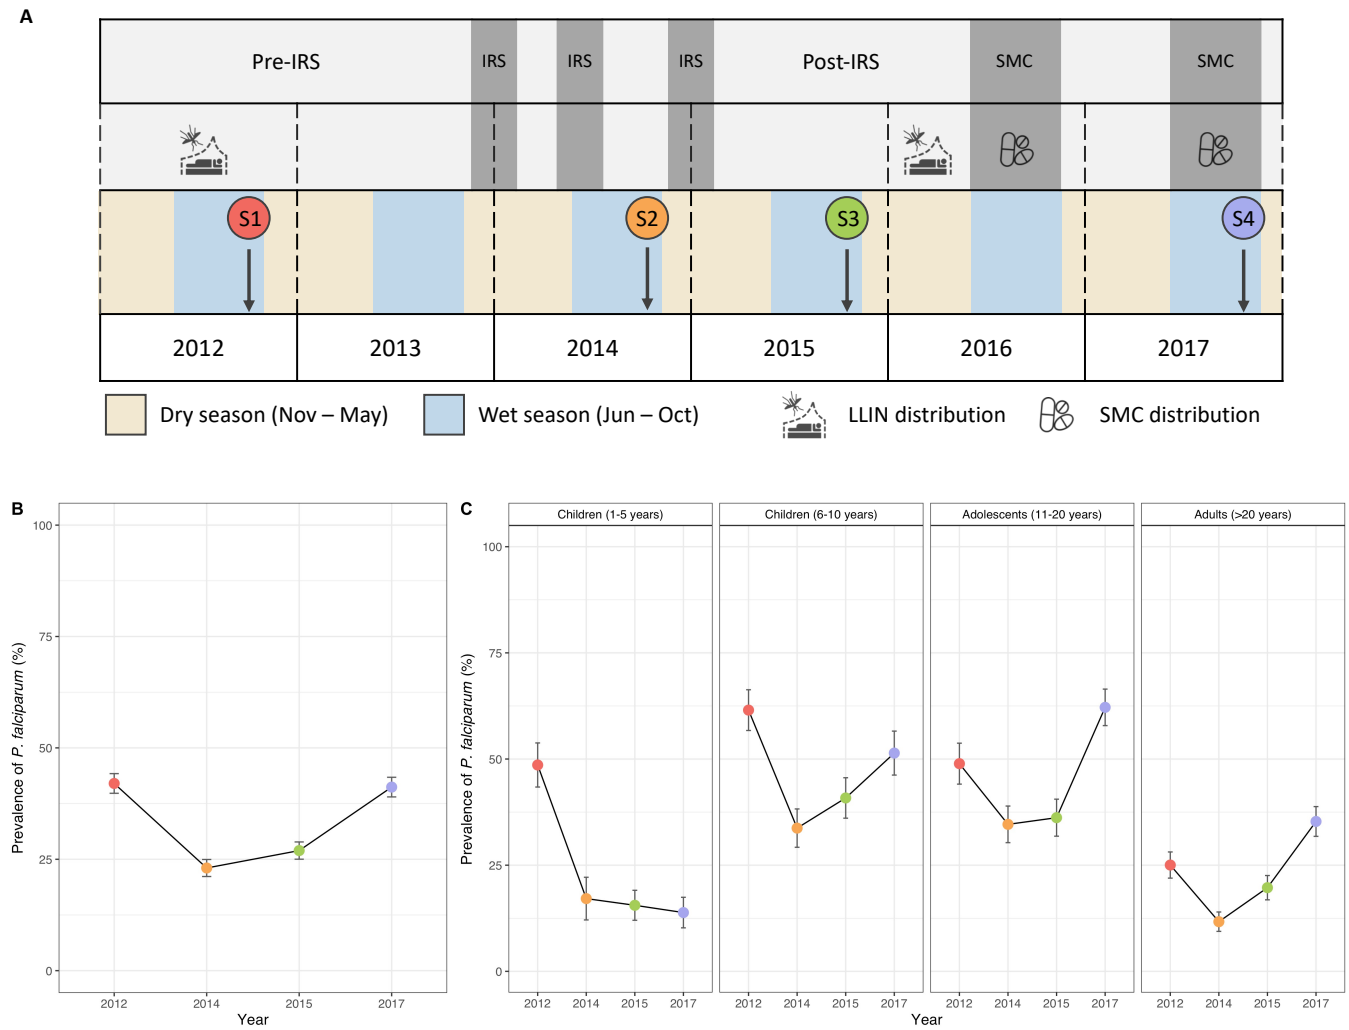

826

827 **Figure 1. Study design and changes in the prevalence of microscopic *P. falciparum* infection following**  
 828 **the IRS and SMC interventions in Bongo, Ghana. (A)** Four age-stratified cross-sectional surveys of ~2,000  
 829 participants per survey were conducted in Bongo, Ghana at the end of the wet seasons in October 2012  
 830 (Survey 1, baseline pre-IRS, red), October 2014 (Survey 2, during IRS, orange), October 2015 (Survey 3,  
 831 post-IRS, green), and October 2017 (Survey 4, SMC, purple) (Table supplement 1) (see Materials and  
 832 Methods). The three rounds of IRS (grey areas) were implemented between 2013 and 2015 (Tiedje et al.,  
 833 2022). SMC was distributed to all children < 5 years of age during the wet seasons in 2016 (two rounds  
 834 between August – September 2016) and 2017 (four rounds between September – December 2017)  
 835 (Gogue et al., 2020). Both IRS and SMC were implemented against a background of widespread LLIN usage  
 836 (Tiedje et al., 2022). Prevalence of microscopic *P. falciparum* infections (%) in the (B) study population and  
 837 (C) for all age groups (years) in each survey. Error bars represent the upper and lower limits of the 95%  
 838 confidence interval (CI) calculated using the Wald Interval.

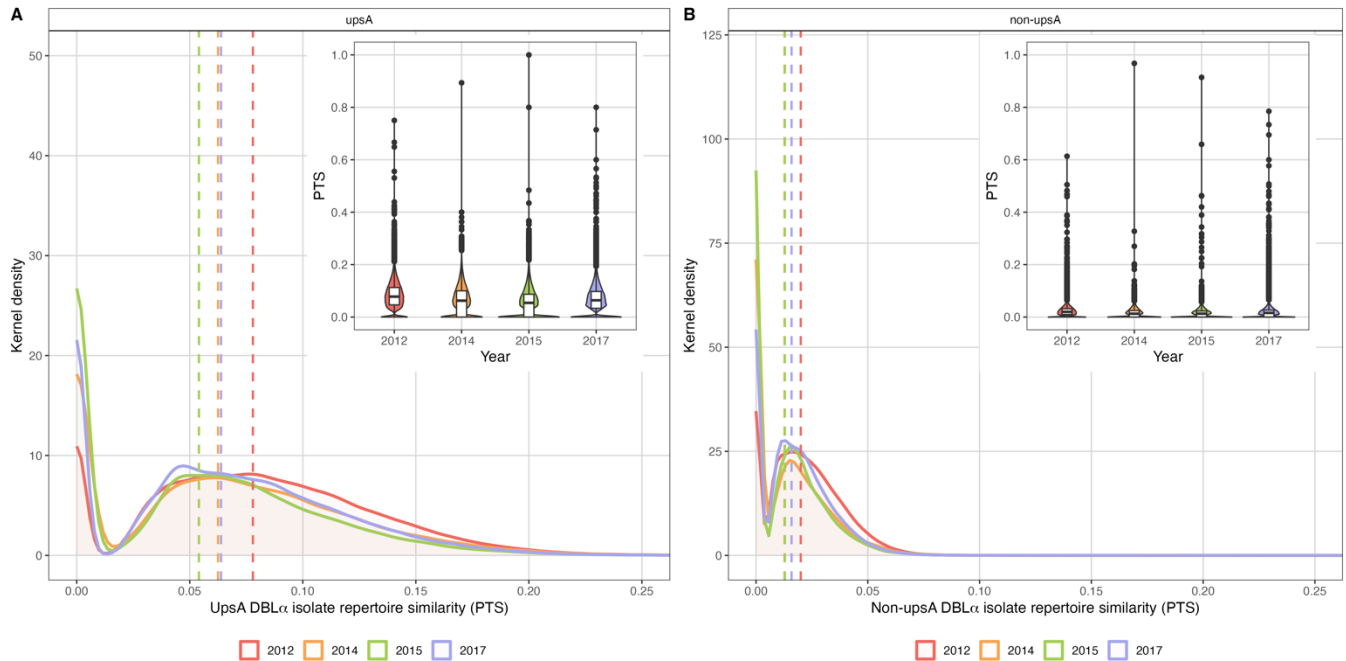

839  
 840 **Figure 2. Sharing of upsA and non-upsA DBL $\alpha$  types among the DBL $\alpha$  isolate repertoires in 2012 (pre-**  
 841 **IRS, red), 2014 (during IRS, orange), 2015 (post-IRS, green), and 2017 (SMC, purple).** The overlapping  
 842 density and violin plots (upper right-hand corners) show the distribution of PTS scores (i.e., DBL $\alpha$  isolate  
 843 repertoire similarity) between the (A) upsA and (B) non-upsA DBL $\alpha$  isolate repertoires for those isolates  
 844 with DBL $\alpha$  sequencing data (Table supplement 2) in each survey. The PTS scales in the density plots have  
 845 been zoomed-in to provide better visualization of the upsA and non-upsA DBL $\alpha$  types PTS distributions.  
 846 The colored dashed lines in the density plots indicate the median PTS scores in each survey for the upsA  
 847 (2012 (red) = 0.078, 2014 (orange) = 0.063, 2015 (green) = 0.054, and 2017 (purple) = 0.064) and non-  
 848 upsA (2012 (red) = 0.020, 2014 (orange) = 0.013, 2015 (green) = 0.013, and 2017 (purple) = 0.016) DBL $\alpha$   
 849 types. *Note:* The non-upsA median PTS values in 2014 (orange) and 2015 (green) were both 0.013 and  
 850 overlap in the figure. In the PTS violin plots the central box plots indicate the medians (centre line),  
 851 interquartile ranges (IQR, upper and lower quartiles), whiskers (1.5x IQR), and outliers (points).

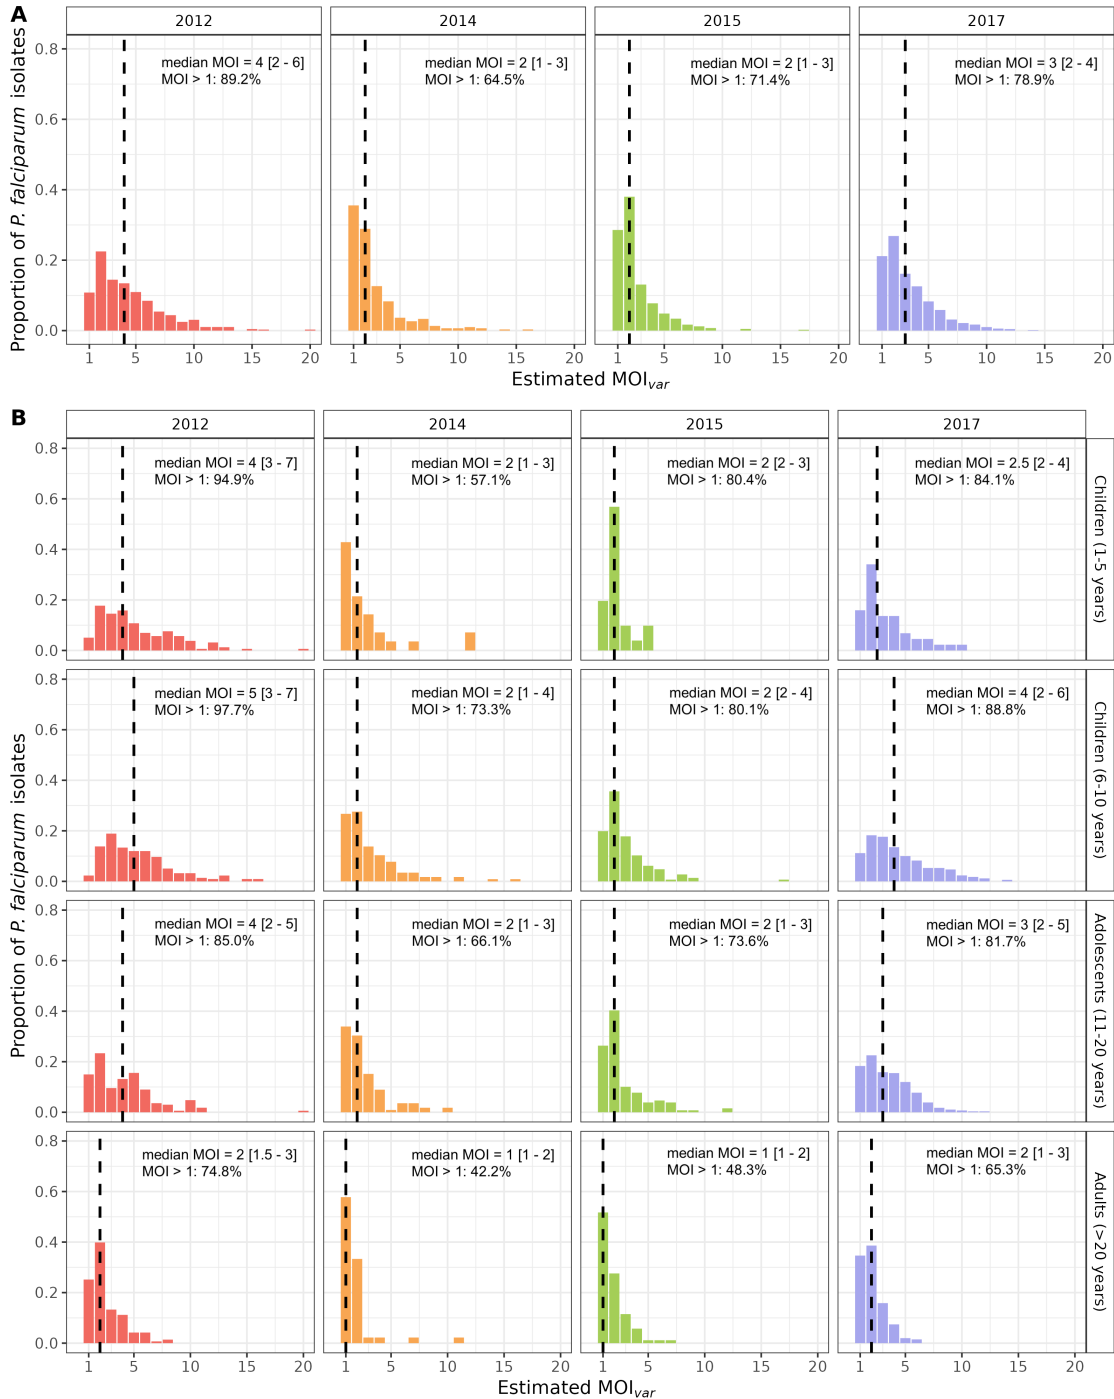

852

853 **Figure 3. MOI<sub>var</sub> distributions in 2012 (pre-IRS, red), 2014 (during IRS, orange), 2015 (post-IRS, green),**  
 854 **and 2017 (SMC, purple) based on pooling the maximum *a posteriori* MOI estimates. Estimated MOI<sub>var</sub>**  
 855 **distributions for the (A) study population and (B) for all age groups (years) in each survey for those isolates**  
 856 **with DBL $\alpha$  sequencing data (Table supplements 2 and 7). The median MOI<sub>var</sub> values are indicated with the**  
 857 **black dashed lines and have been provided in the top right corner (median MOI<sub>var</sub> value [interquartile**  
 858 **range, upper and lower quartiles]) along with the percentage of *P. falciparum* infections that were**  
 859 **multiclonal (MOI<sub>var</sub> > 1) in each survey and age group (years).**

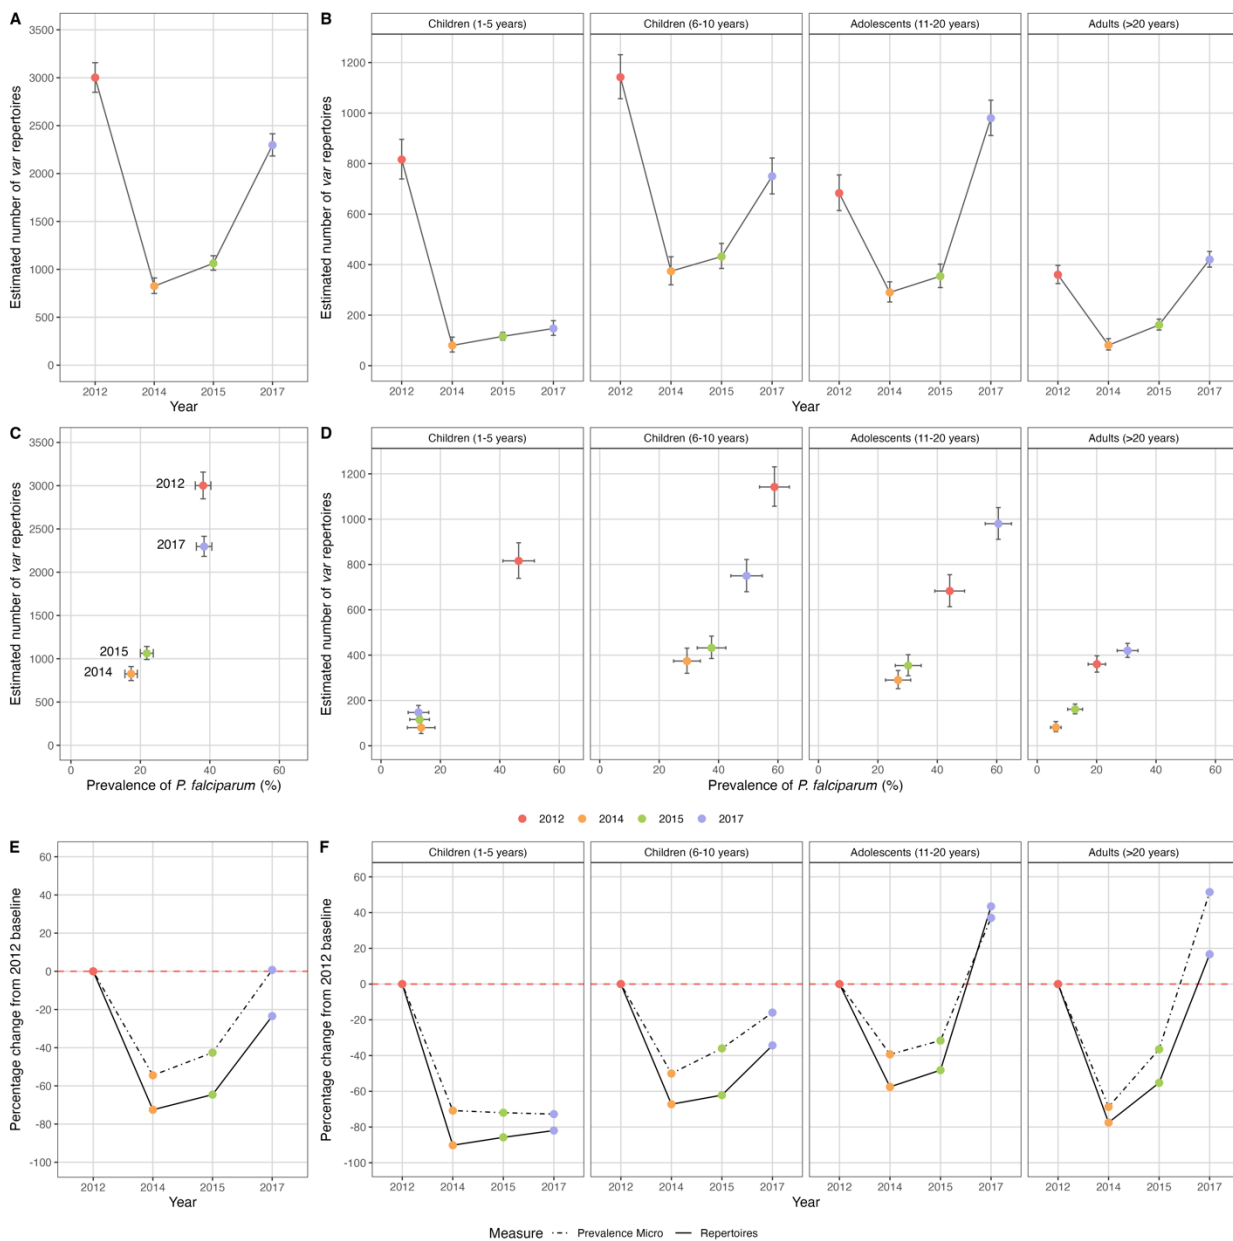

860

861 **Figure 4.** Estimated number and relative change in the number of *P. falciparum* var repertoires in  
 862 2012 (pre-IRS, red), 2014 (during IRS, orange), 2015 (post-IRS, green), and 2017 (SMC, purple). The  
 863 estimated number of var repertoires (i.e., census population size) for those isolates with DBL $\alpha$  sequencing  
 864 data (Table supplements 2 and 7) in the (A) study population and (B) for all age groups (years). The  
 865 estimated number of var repertoires vs. *P. falciparum* prevalence for (C) study population and (D) for all  
 866 age groups (years) (Table supplement 7). The percentage change in *P. falciparum* prevalence (black dotted  
 867 line) and the estimated number of var repertoires (black solid line) in 2014, 2015, and 2017 compared to  
 868 the 2012 baseline survey (red dashed horizontal line at 0% change) for the (E) study population and (F)  
 869 for all age groups (years). Error bars in (A-D) represent the upper and lower limits of the 95% confidence  
 870 intervals (95% CIs). The 95% CIs for the number of var repertoires (i.e., census population size) were

871 calculated based on a bootstrap approach. We resampled 10,000 replicates from the original population-  
872 level distribution with replacement. Each resampled replicate has the same size as the original sample.  
873 We then derive the 95% CI based on the distribution of the resampled replicates. The 95% CIs for *P.*  
874 *falciparum* prevalence (%) were calculated using the Wald Interval.



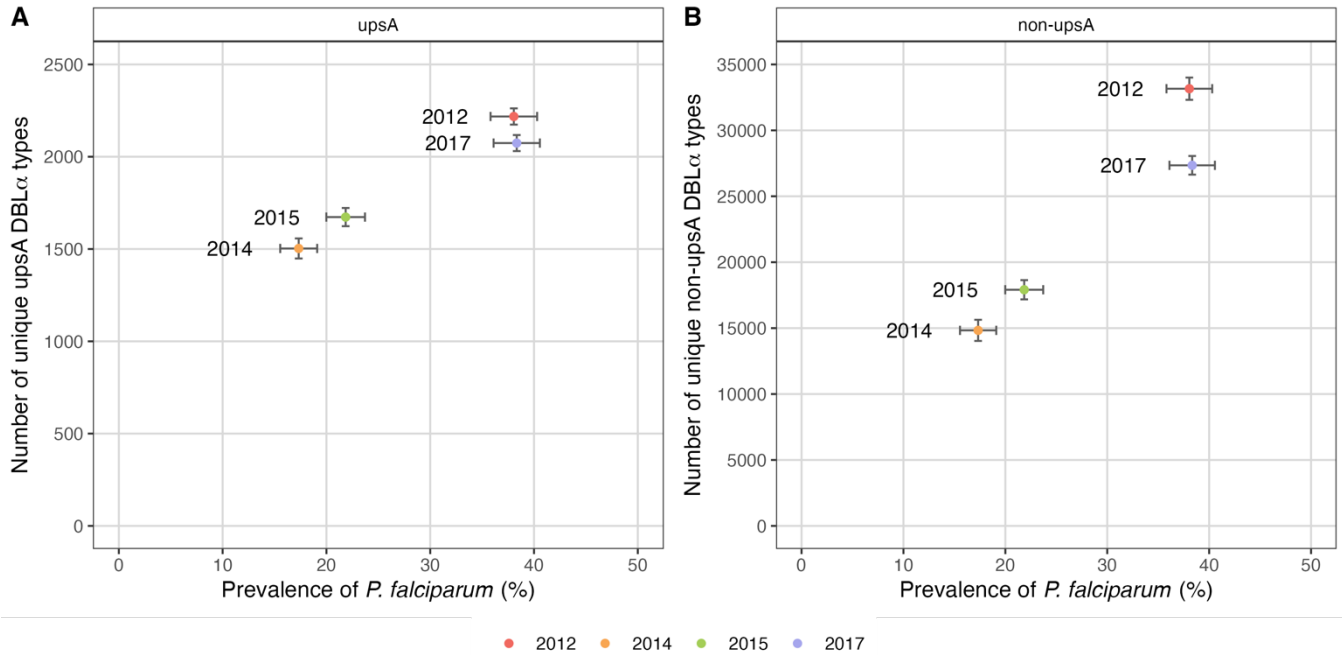

875  
876 **Figure 5. UpsA and non-upsA DBL $\alpha$  type richness in 2012 (pre-IRS, red), 2014 (during IRS, orange),**  
877 **2015 (post-IRS, green), and 2017 (SMC, purple).** Number of unique (A) upsA and (B) non-upsA DBL $\alpha$   
878 types (i.e., richness) observed in each survey vs. *P. falciparum* prevalence based on those isolates with  
879 DBL $\alpha$  sequencing data (Table supplement 2). Error bars represent the upper and lower limits of the 95%  
880 confidence intervals (95% CIs) for the *P. falciparum* prevalence (%; x-axis) and  $\pm 2$  standard deviations ( $\pm$   
881 2SD) for the number of unique upsA and non-upsA DBL $\alpha$  types (y-axis). The 95% CIs for *P. falciparum*  
882 prevalence (%) were calculated using the Wald Interval. The  $\pm 2$ SD for the number of unique upsA and  
883 non-upsA DBL $\alpha$  types were calculated based on a bootstrap approach. We resampled 10,000 replicates  
884 from the original population-level distribution with replacement. Each resampled replicate has the same  
885 size as the original sample. We then derive the standard deviation (SD) based on the distribution of the  
886 resampled replicates.

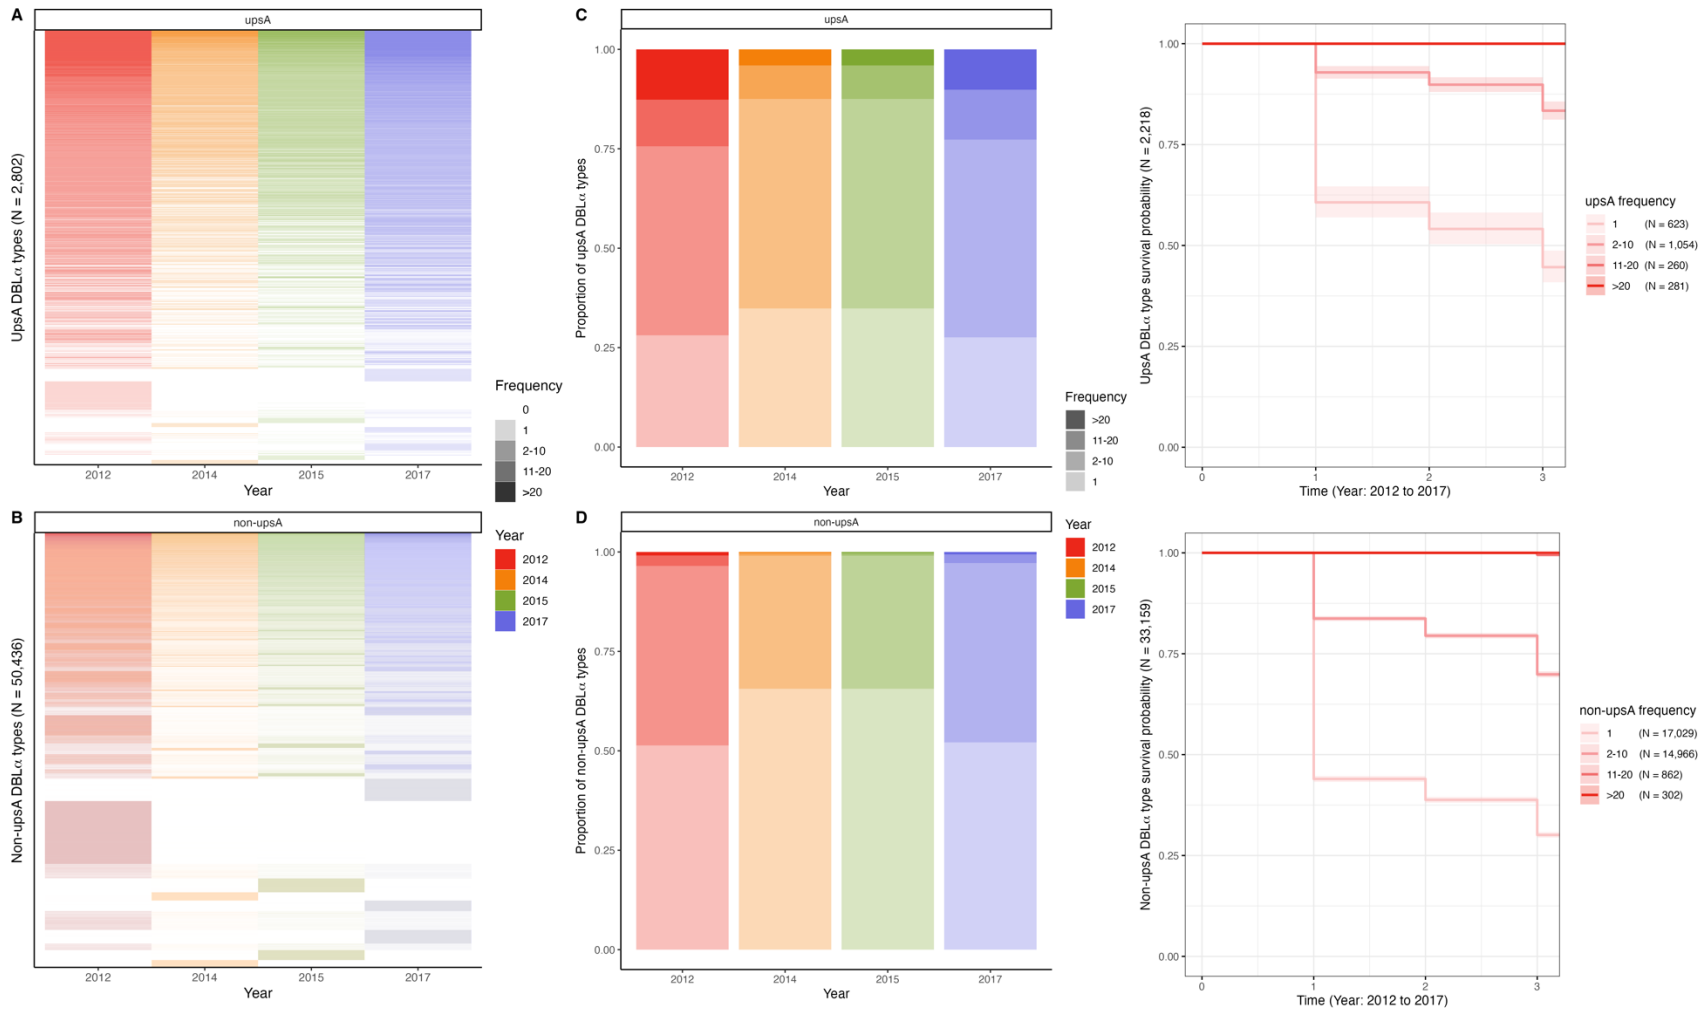

887

888 **Figure 6. UpsA and non-upsA DBL $\alpha$  type frequencies and survival in 2012 (pre-IRS, red), 2014 (during IRS, orange), 2015 (post-IRS,**  
 889 **green), and 2017 (SMC, purple).** Heatmaps showing the patterns of diversity for the (A) upsA and (B) non-upsA DBL $\alpha$  types. The  
 890 columns represent all the upsA and non-upsA DBL $\alpha$  types observed in the four surveys, and the rows represent each of the 2,802 upsA  
 891 DBL $\alpha$  types and the 50,436 non-upsA DBL $\alpha$  types (Table supplement 2). White rows are used to denote the absence of a specific DBL $\alpha$   
 892 type, while the presence of a DBL $\alpha$  type is indicated in colour and further categorised (colour gradations) based on the frequency or the  
 893 number of times (i.e., number of isolates) a DBL $\alpha$  type was observed in each survey (Frequency categories: 1, 2-10, 11-20, > 20 isolates;  
 894 Note the frequency category cut-offs were chosen based on the frequency distributions in Figure supplement 7). The proportions of (C)  
 Impact of IRS and SMC on census population size (Updated 31\_07\_24)

895 upsA and (D) non-upsA DBL $\alpha$  types in each survey based on the number of times (i.e., number of isolates) they were observed in each  
896 survey. Kaplan-Meier survival curves for the (E) upsA and (F) non-upsA DBL $\alpha$  types across time (2012 to 2017) categorised based on  
897 their frequency at baseline in 2012 (pre-IRS, red). The colored shaded areas represent the upper and lower limits of the 95% confidence  
898 intervals (95% CIs) with the number (N) of upsA and non-upsA DBL $\alpha$  types in each frequency category are provided in parenthesis. These  
899 survival curves include only those upsA (N = 2,218) and non-upsA (N = 33,159) DBL $\alpha$  types that were seen at baseline in 2012 (pre-IRS)  
900 as indicated in red (Table supplement 2). The x-axis indicates time where time "0" denotes 2012 (pre-IRS), "1" denotes 2014 (during  
901 IRS), "2" denotes 2015 (post-IRS), and finally "3" denotes 2017 (SMC). *Note:* In the survival curves the 11-20 and > 20 frequency  
902 categories for both the (E) upsA and (F) non-upsA DBL $\alpha$  types overlap in the figure.
