# Supplementary material for: Measuring changes in Plasmodium falciparum census population size in response to sequential malaria control interventions
Source: bioRxiv or medRxiv preprint supplement (doi:10.1101/2023.05.18.23290210), 2025-06-17
Supplement: Supplementary file [file media-1.pdf]

## SUPPLEMENTAL INFORMATION

### Measuring changes in *Plasmodium falciparum* census population size in response to sequential malaria control interventions

Kathryn E. Tiedje<sup>1,2§</sup>, Qi Zhan<sup>3,4§</sup>, Shazia Ruybal-Pésantez<sup>2†</sup>, Gerry Tonkin-Hill<sup>2,5</sup>, Qixin He<sup>4‡</sup>, Mun Hua Tan<sup>1</sup>, Dionne C. Argyropoulos<sup>1</sup>, Samantha L. Deed<sup>1,2</sup>, Anita Ghansah<sup>6</sup>, Oscar Bangre<sup>7</sup>, Abraham R. Oduro<sup>7</sup>, Kwadwo A. Koram<sup>8</sup>, Mercedes Pascual<sup>9,10</sup>, and Karen P. Day<sup>1,2</sup>

<sup>1</sup> Department of Microbiology and Immunology, Bio21 Institute and Peter Doherty Institute, The University of Melbourne; Melbourne, Australia

<sup>2</sup> School of BioSciences, Bio21 Institute, The University of Melbourne; Melbourne, Australia

<sup>3</sup> Committee on Genetics, Genomics and Systems Biology, The University of Chicago; Chicago, Illinois, USA

<sup>4</sup> Department of Ecology and Evolution, The University of Chicago; Chicago, Illinois, USA

<sup>5</sup> Bioinformatics Division, Walter and Eliza Hall Institute; Melbourne, Australia

<sup>6</sup> Department of Parasitology, Noguchi Memorial Institute for Medical Research, University of Ghana; Legon, Ghana

<sup>7</sup> Navrongo Health Research Centre, Ghana Health Service; Navrongo, Ghana

<sup>8</sup> Epidemiology Department, Noguchi Memorial Institute for Medical Research, University of Ghana; Legon, Ghana

<sup>9</sup> Department of Biology and Department of Environmental Sciences, New York University, New York, New York, USA

<sup>10</sup> Santa Fe Institute, Santa Fe, New Mexico, USA

† *Current affiliations:* Department of Infectious Disease Epidemiology and MRC Centre for Global Infectious Disease Analysis, School of Public Health, Imperial College London, United Kingdom

‡ *Current affiliation:* Department of Biological Sciences, Purdue University; West Lafayette, United States

§ These authors share first authorship

# 1 SUPPLEMENTAL METHODS

2

## 3 **Var genotyping and sequence analysis**

4 For *var* genotyping, the sequence region within the *var* genes encoding the DBL $\alpha$  domain of PfEMP1 were  
5 amplified in a single-step PCR from genomic DNA using primers for multiplexed sequencing as reported in  
6 Rask et al. (Rask et al., 2016). We coupled template-specific degenerate primer sequences targeting  
7 homology block 2 (forward primer: DBL $\alpha$ AF, 5'-GCACGMAGTTTYGC-3') and homology block 3 (reverse  
8 primer: DBL $\alpha$ BR, 5'-GCCCATTCSTCGAACCA- 3') (Bull et al., 2005; Rask et al., 2010) with a GS FLX Titanium  
9 primer sequence. Each of the forward and reverse DBL $\alpha$  primers were barcoded with a unique 10 bp  
10 multiplex identifier (MID) tag published by (Roche, 2009). For additional details on the validation of these  
11 primers for amplification of sequences of the appropriate length (~477 bp) using *P. falciparum* reference  
12 strains (3D7, Dd2, and HB3) see Rask et al. (Rask et al., 2016).

13

14 Each PCR reaction was prepared in a total volume of 40  $\mu$ L consisting of 0.5x buffer, 2 mM of MgCl<sub>2</sub>, 0.07  
15 mM of dNTPs, 0.375  $\mu$ M of each primer (DBL $\alpha$ AF, DBL $\alpha$ BR), 3 units of GoTaq G2 Flexi DNA polymerase  
16 (Promega), and 2  $\mu$ L of isolate genomic DNA. The PCR cycling conditions involved 95°C for 2 min, followed  
17 by 30 cycles of 95°C for 40 seconds, 49°C for 90 seconds, 65°C for 90 seconds, and a final extension step  
18 of 65°C for 10 min. Positive controls (laboratory genomic *P. falciparum* DNA) and a negative control (no  
19 template) were included for quality assurance. The PCR products were purified using the SPRI method  
20 (solid-phase reversible immobilization) (Agencourt, AMPure XP). Purified PCR product concentrations  
21 were measured using the Quant-iT PicoGreen dsDNA kit as per the manufacturer's instructions  
22 (Invitrogen). We assayed fluorescence intensity using a Perkin-Elmer VICTOR X3 multilabel plate reader,

23 with fluorescein excitation wavelength of ~480 nm and emission of ~520 nm wavelength. Amplicons were  
24 then pooled equimolarly with each pool consisting of up to 106 isolates, all with unique MID tags. The  
25 libraries were then prepared using the KAPA Low-Throughput Library Preparation Kit (Kapa Biosystems)  
26 and sequenced on an Illumina MiSeq platform using the 2x300bp paired-end protocol and MiSeq Reagent  
27 kit v3 chemistry (New York University Genome Technology Center, New York, NY, USA; Australian Genome  
28 Research Facility, Melbourne, Australia) (Figure supplement 1).

29

30 The raw sequence data was then cleaned using our published customized bioinformatic pipeline  
31 (<https://github.com/UniMelb-Day-Lab/DBLaCleaner>) (He et al., 2018). This pipeline was used to de-  
32 multiplex and merge the paired-end reads as well as remove low-quality sequences and chimeras using  
33 several filtering parameters (see Figure supplement 2 for additional details). These steps resulted in a total  
34 of 291,783 cleaned DBL $\alpha$  sequences for the 2,572 *P. falciparum* isolates sequenced (Figure supplement 2,  
35 Table supplement 2). To identify the unique DBL $\alpha$  types, we then clustered these cleaned DBL $\alpha$  sequences  
36 with 241,693 DBL $\alpha$  sequences available from this Bongo study, as well as the *P. falciparum* reference  
37 strains (3D7, Dd2, and HB3) included as positive controls (He et al., 2018; Pilosof et al., 2019; Rorick et al.,  
38 2018), at the standard 96% sequence identity (<https://github.com/UniMelb-Day-Lab/clusterDBLalpha>)  
39 (Barry et al., 2007; Day et al., 2017; Ruybal-Pesántez et al., 2017). Our dataset was then further curated  
40 by translating the DBL $\alpha$  types (N = 68,503) into amino acid sequences and removing any DBL $\alpha$  types that  
41 could not be translated (i.e., contained a stop codon) (N = 135; 0.2%). The remaining DBL $\alpha$  types were  
42 then assigned to their most likely DBL $\alpha$  domain class (i.e., DBL $\alpha$ 0, DBL $\alpha$ 1, or DBL $\alpha$ 2) using a hidden Markov  
43 model, and further classified based on the association of specific domain classes with semi-conserved

44 upstream promoter sequences (ups) as either upsA or non-upsA DBL $\alpha$  types  
45 (<https://github.com/UniMelb-Day-Lab/classifyDBLalpha>) (Ruybal-Pesántez et al., 2017).

46 SUPPLEMENTAL FIGURES

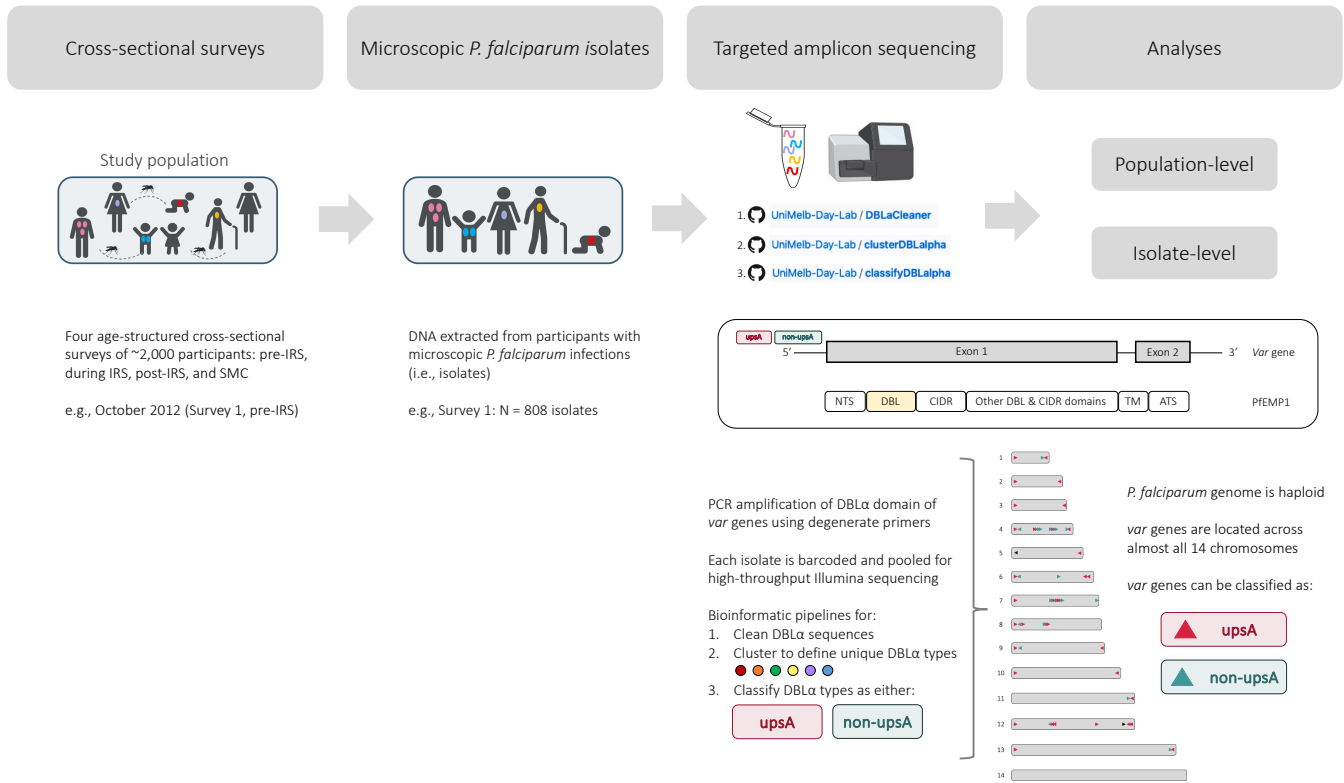

47

48 **Figure supplement 1. Schematic diagram of the var genotyping (i.e., varcoding) approach.** For  
 49 additional details about each step, see Materials and Methods and Supplemental Methods. A schematic  
 50 insert of the var gene locus and PfEMP1 has been included as defined in Rask et al. (Rask et al., 2010),  
 51 with its N-terminal segment (NTS), Duffy binding-like (DBL) domains, cysteine-rich interdomain regions  
 52 (CIDR), one transmembrane region (TM), and the acidic terminal segment (ATS). The Illumina sequencer  
 53 stock image was created with BioRender.com.

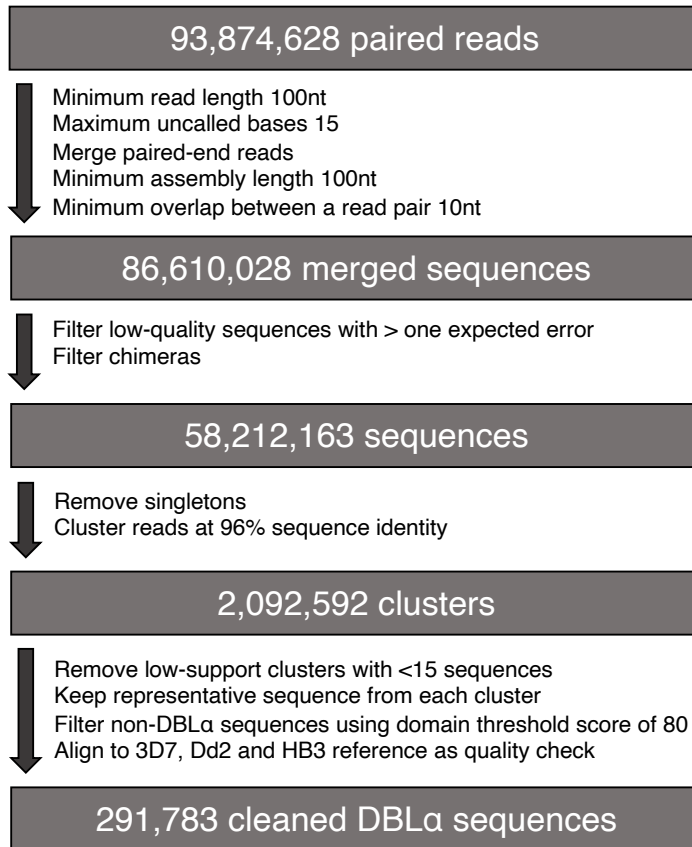

54

55 **Figure supplement 2. Bioinformatic sequence data processing flowchart.** The flowchart shows the  
 56 bioinformatic process to clean the raw de-multiplexed paired reads, with details on the filtering  
 57 parameters utilized at each step. This customized bioinformatic pipeline is described in detail in He et al.  
 58 (He et al., 2018).  
 59

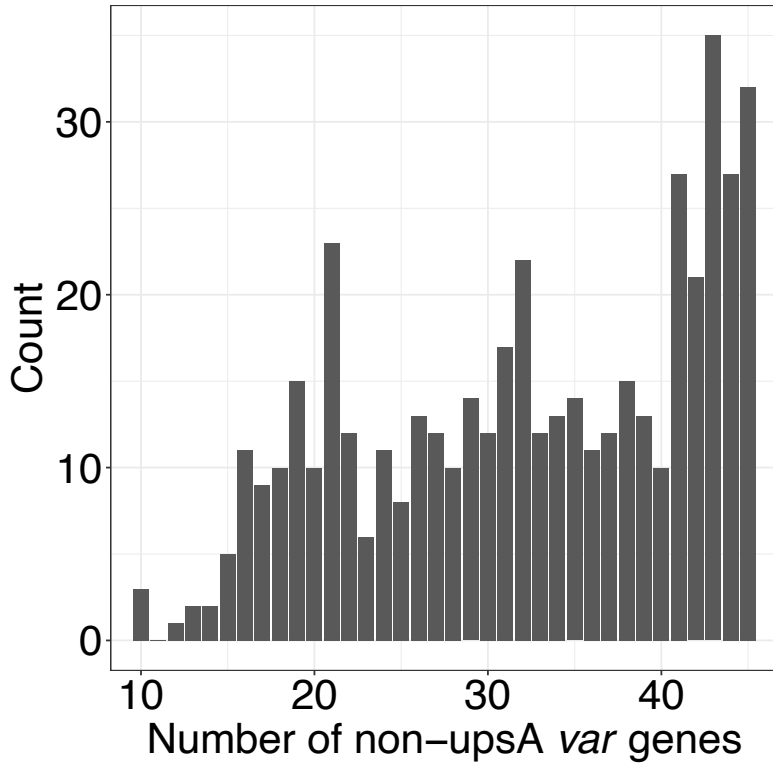

60  
 61 **Figure supplement 3. Histogram of the number of non-upsA DBLα var gene types sequenced per**  
 62 **repertoire for those isolates with monoclonal infections (MOI = 1)** (Labbé et al., 2023). The molecular  
 63 sequences used to derive this repertoire size distribution were previously sequenced from isolates  
 64 sampled during six cross-sectional surveys made from 2012 to 2016 in Bongo District, Ghana (He et al.,  
 65 2018; Pulosof et al., 2019; Ruybal-Pesántez et al., 2022; Tiedje et al., 2022). These isolates were estimated  
 66 to be monoclonal infections (i.e., human hosts estimated to be infected by a single *P. falciparum* clone,  
 67 MOI = 1), based on a cut-off value of 45 non-upsA DBLα types. This cut-off was selected based on the  
 68 median number of non-upsA DBLα types identified for the 3D7 laboratory isolate included as a control  
 69 during *var*coding (Ghansah et al., 2023). Note a version of this figure was previously published in Labbé et  
 70 al. (Labbé et al., 2023).

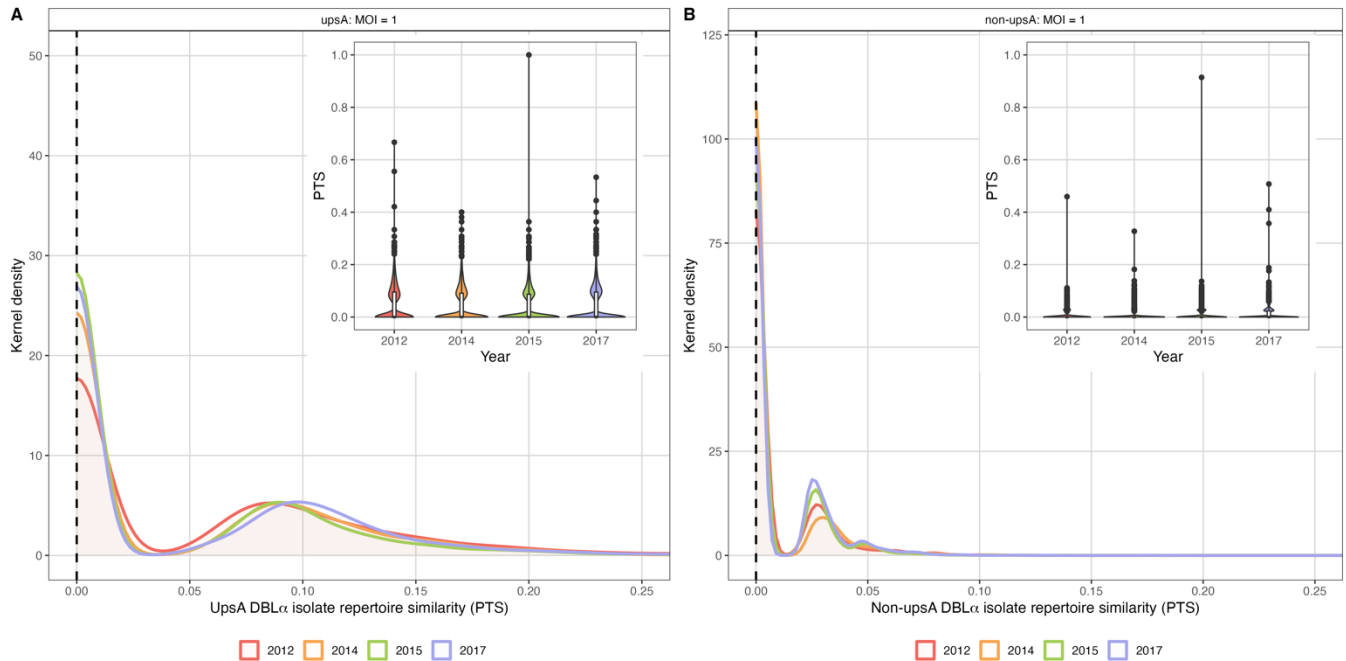

71  
 72 **Figure supplement 4. Sharing of upsA and non-upsA DBLα types among the DBLα isolate repertoires**  
 73 **for those isolates with an estimated  $MOI_{var}$  equal to one ( $MOI_{var} = 1$ ) in 2012 (pre-IRS, red), 2014**  
 74 **(during IRS, orange), 2015 (post-IRS, green), and 2017 (SMC, purple).** The overlapping density and  
 75 violin plots (upper right-hand corners) show the distribution of PTS scores (i.e., DBLα isolate repertoire  
 76 similarity) between the (A) upsA and (B) non-upsA DBLα isolate repertoires with an  $MOI_{var} = 1$  in each  
 77 survey. The PTS scales in the density plots have been zoomed-in to provide better visualization of the PTS  
 78 distributions for the upsA and non-upsA DBLα types. The black dashed lines in the density plots indicate  
 79 the median PTS scores for the upsA and non-upsA DBLα types in each survey, which were all equal to zero.  
 80 *Note:* In the PTS violin plots the central box plots indicate the medians (centre line), interquartile ranges  
 81 (IQR, upper and lower quartiles), whiskers (1.5x IQR), and outliers (points).



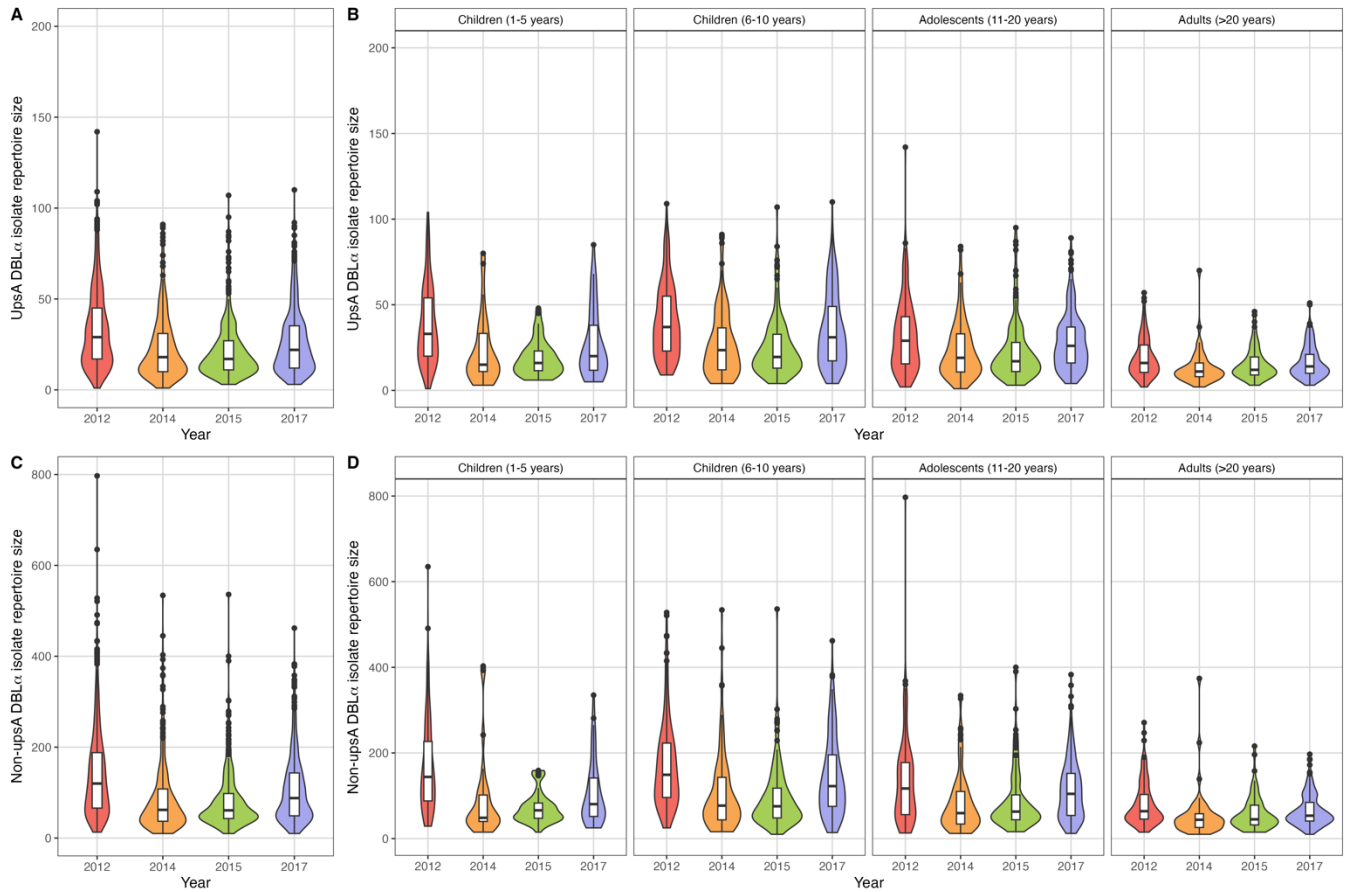

82

83

84

85

86

87

88

89

90

Figure supplement 5. UpsA and non-upsA DBL $\alpha$  isolate repertoire sizes in 2012 (pre-IRS, red), 2014 (during IRS, orange), 2015 (post-IRS, green), and 2017 (SMC, purple). Violin plots showing the frequency distributions of the upsA and non-upsA DBL $\alpha$  isolate repertoire sizes for the (A, C) study population and (B, D) for all age groups (years) in each survey. The width of each violin plot illustrates the relative frequency of the upsA and non-upsA DBL $\alpha$  repertoire sizes in each survey. *Note:* The y-axis range for the upsA and non-upsA DBL $\alpha$  isolate repertoire sizes are different. The central box plots indicate the median upsA and non-upsA DBL $\alpha$  repertoire sizes (centre line), interquartile ranges (IQR, upper and lower quartiles), whiskers (1.5x IQR), and outliers (points) for each violin plot.

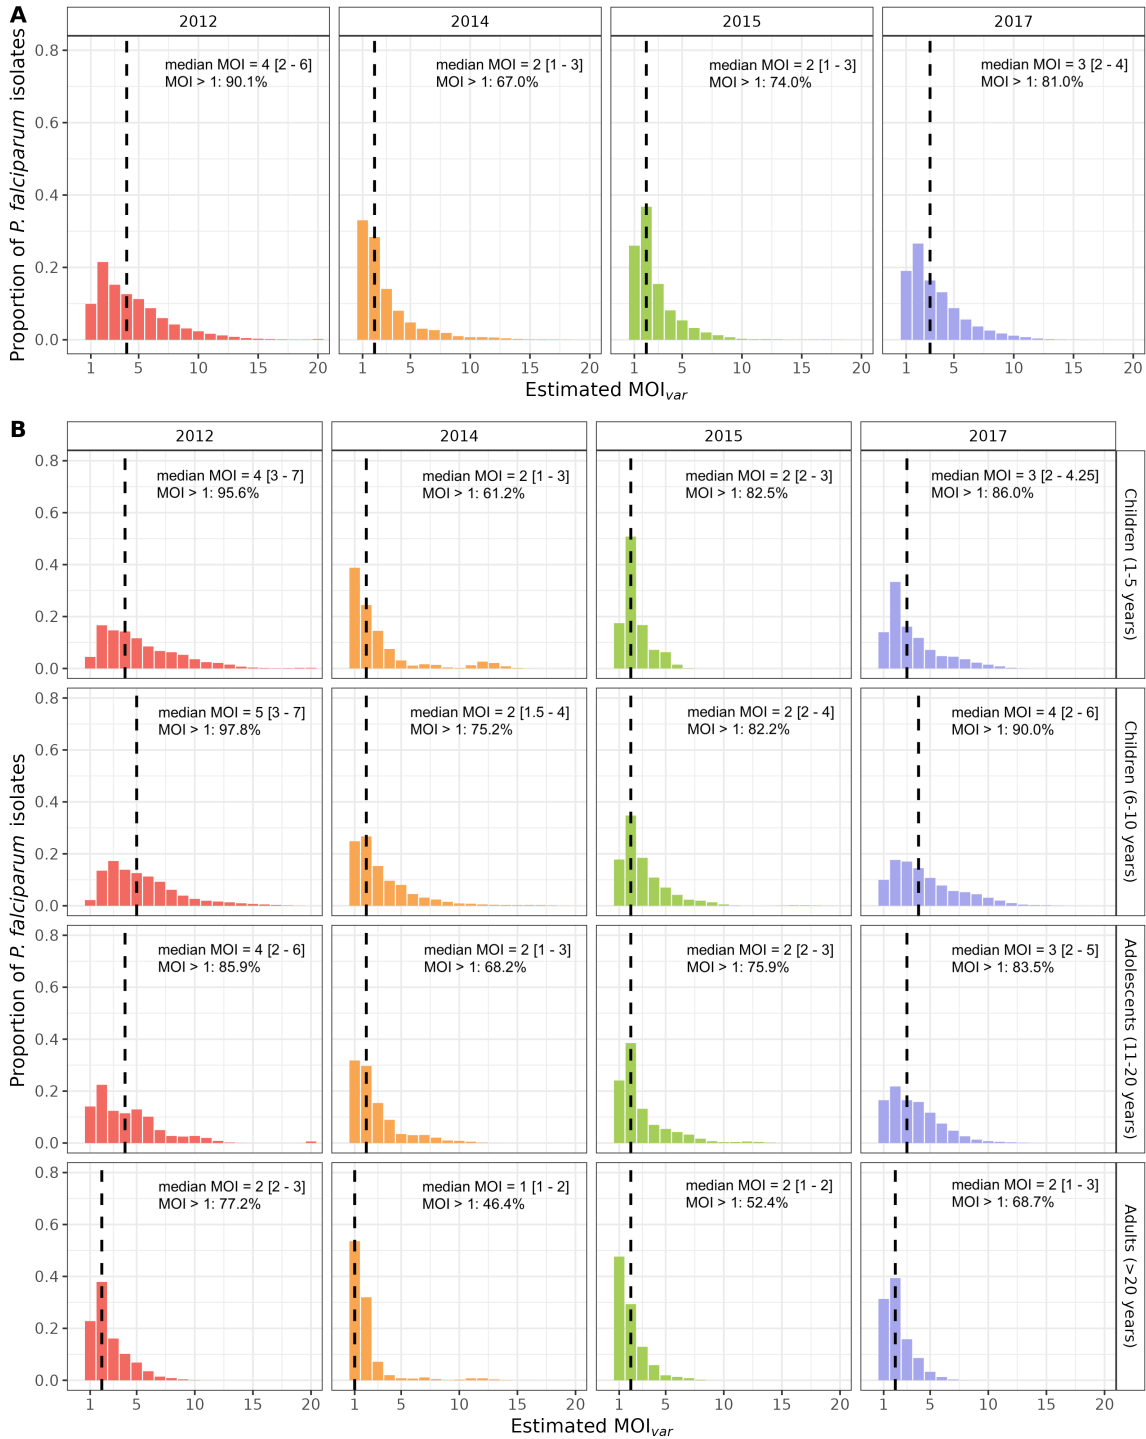

91  
 92 **Figure supplement 6. MOI<sub>var</sub> distributions in 2012 (pre-IRS, red), 2014 (during IRS, orange), 2015**  
 93 **(post-IRS, green), and 2017 (SMC, purple) based on the mixture distribution approach. Estimated**  
 94 **MOI<sub>var</sub> distributions for the (A) study population and (B) for all age groups (years) in each survey for those**  
 95 **isolates with DBL $\alpha$  sequencing data (Table supplement 2 and 6). The median MOI<sub>var</sub> values are indicated**  
 96 **with the black dashed lines and have been provided in the top right corner (median MOI<sub>var</sub> value**  
 97 **[interquartile range, upper and lower quartiles]) along with the percentage of *P. falciparum* infections that**  
 98 **were multiclonal (MOI<sub>var</sub> > 1) in each survey and age group (years).**

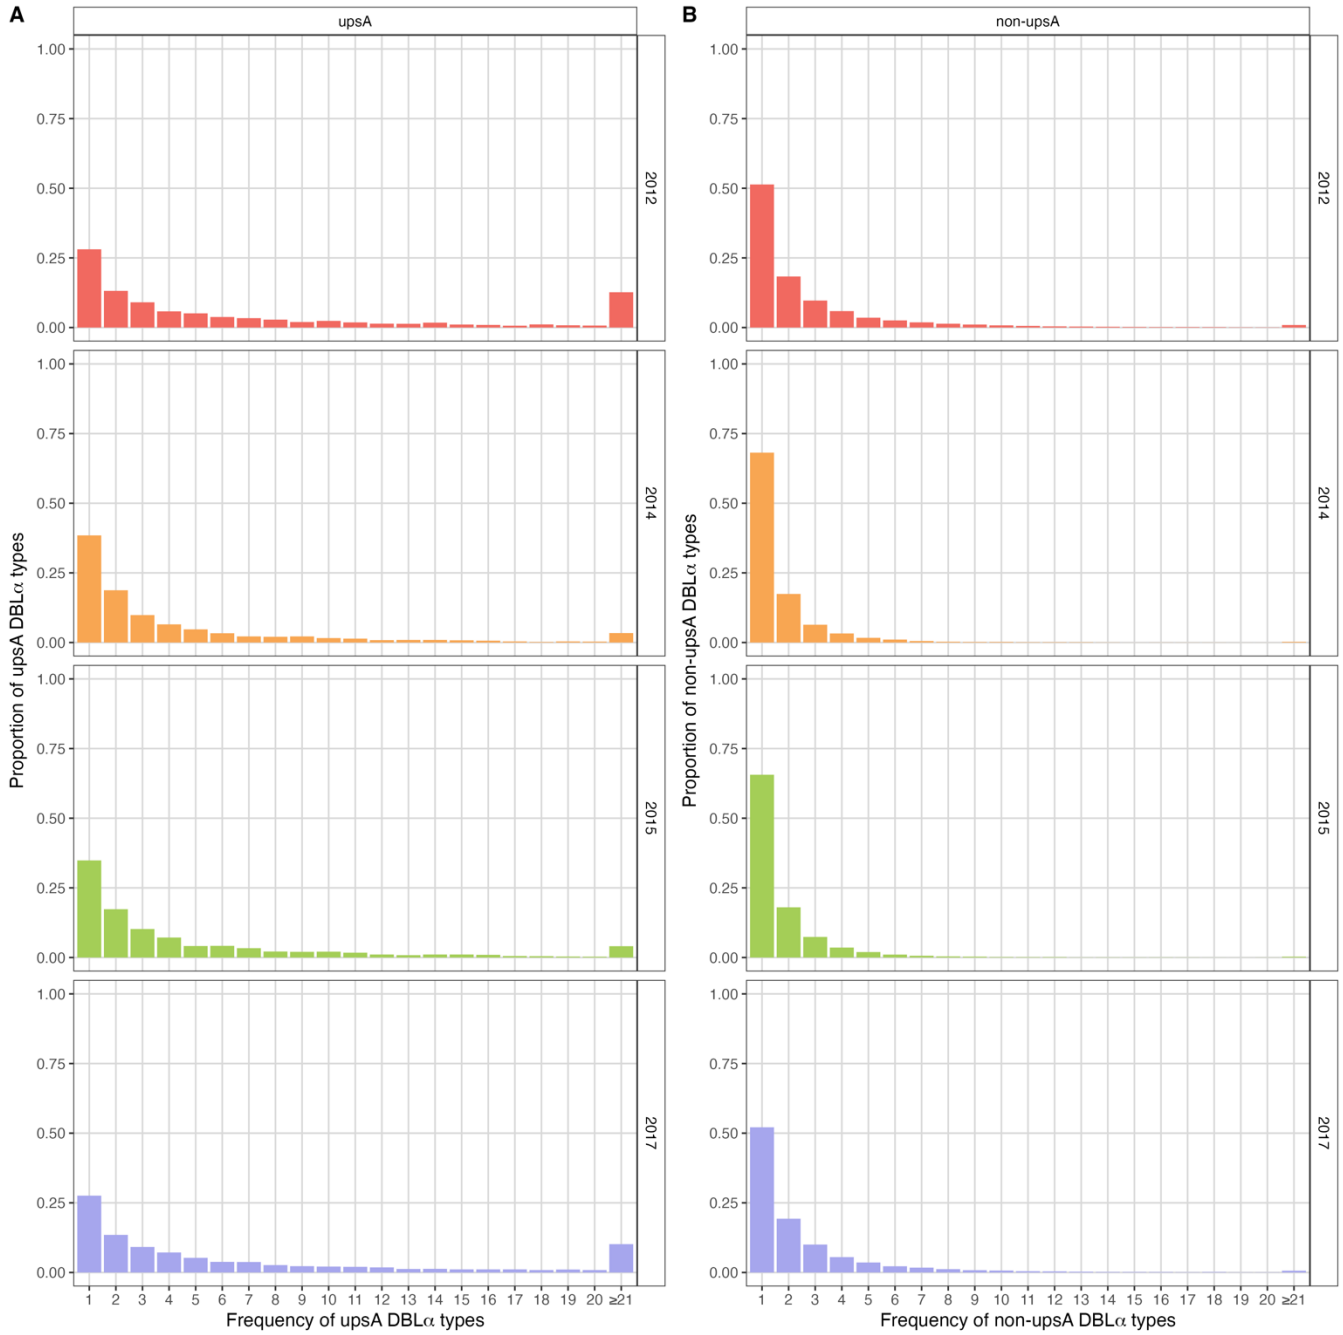

99  
100  
101  
102

Figure supplement 7. Frequency distributions for the (A) upsA and (B) non-upsA DBL $\alpha$  types in 2012 (pre-IRS, red), 2014 (during IRS, orange), 2015 (post-IRS, green), and 2017 (SMC, purple).

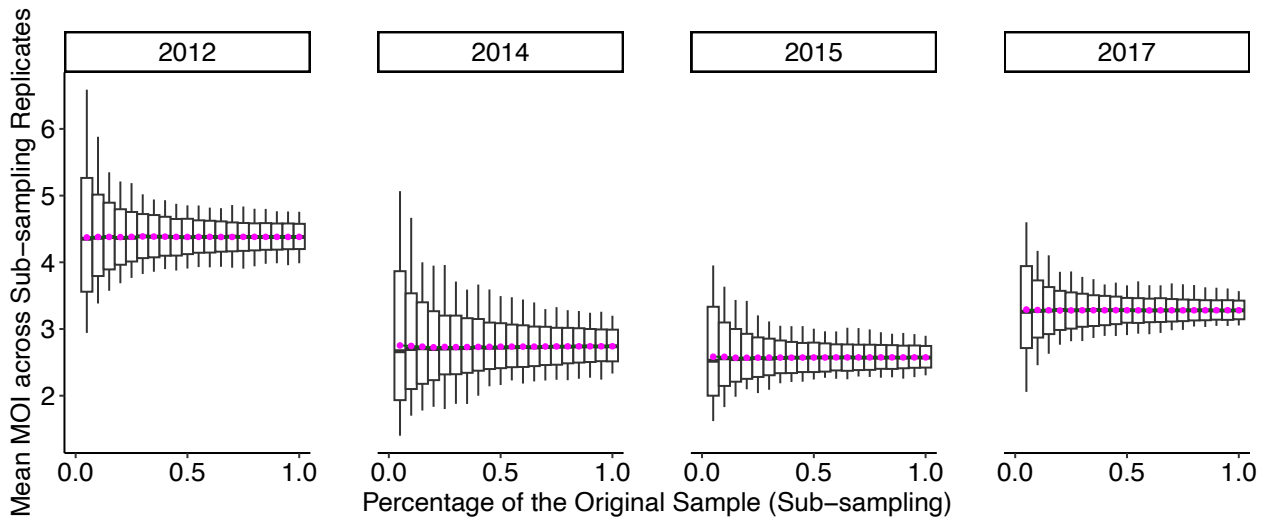

103  
 104 **Figure supplement 8. Mean MOI for the sub-sampling replicates in 2012 (pre-IRS), 2014 (during IRS),**  
 105 **2015 (post-IRS), and 2017 (SMC).** The mean MOI (pink dots) is stable relative to the sampling size or  
 106 sampling depth, which allows for the extrapolation from the census population size of our population  
 107 sample to that of the whole population of local hosts. For each sampling depth, we generate 1,000 sub-  
 108 sampling replicates with replacement. Minimum, 5% quantile, median, 95% quantile, and maximum  
 109 values are shown in the boxplot.

110 SUPPLEMENTAL TABLES

111

112 **Table supplement 1.** Age group (years) breakdown and parasitological characteristics of the participants  
 113 surveyed in Bongo, Ghana in each survey (i.e., 2012, 2014, 2015, 2017).

|                                                                | October 2012<br>(pre-IRS)               | October 2014<br>(IRS)               | October 2015<br>(post-IRS)              | October 2017<br>(SMC)                  |
|----------------------------------------------------------------|-----------------------------------------|-------------------------------------|-----------------------------------------|----------------------------------------|
| <b>Number of participants surveyed<sup>a</sup></b>             | <b>1923</b>                             | <b>1866</b>                         | <b>2022</b>                             | <b>1915</b>                            |
| <b>Age groups (years)<sup>b</sup></b>                          |                                         |                                     |                                         |                                        |
| Children: 1-5 years                                            | 356 (18.5)                              | 216 (11.6)                          | 405 (20.0)                              | 354 (18.5)                             |
| Children: 6-10 years                                           | 395 (20.5)                              | 421 (22.5)                          | 409 (20.2)                              | 358 (18.7)                             |
| Adolescents: 11-20 years                                       | 413 (21.5)                              | 468 (25.1)                          | 467 (23.1)                              | 489 (25.5)                             |
| Adults: >20 years                                              | 759 (39.5)                              | 761 (40.8)                          | 741 (36.7)                              | 714 (37.3)                             |
| <b>Microscopic <i>P. falciparum</i> prevalence<sup>c</sup></b> | <b>808 (42.0)</b>                       | <b>430 (23.0)</b>                   | <b>545 (27.0)</b>                       | <b>789 (41.2)</b>                      |
| Children: 1-5 years                                            | 173 (48.6)                              | 37 (17.1)                           | 63 (15.6)                               | 49 (13.8)                              |
| Children: 6-10 years                                           | 243 (61.5)                              | 142 (33.7)                          | 167 (40.8)                              | 184 (51.4)                             |
| Adolescents: 11-20 years                                       | 202 (48.9)                              | 162 (34.6)                          | 169 (36.2)                              | 304 (62.2)                             |
| Adults: > 20 years                                             | 190 (25.0)                              | 89 (11.7)                           | 146 (19.7)                              | 295 (35.3)                             |
| <b>Microscopic <i>P. falciparum</i> density<sup>d</sup></b>    | <b>520 [160-1,640]<br/>(40-126,040)</b> | <b>200 [80-600]<br/>(40-73,360)</b> | <b>320 [120-1,800]<br/>(40-113,520)</b> | <b>440 [160-1,720]<br/>(40-97,520)</b> |
| Children: 1-5 years                                            | 1640 [400-9,840]<br>(40-126,040)        | 440 [120-1,080]<br>(40-15,880)      | 1840 [240-19,940]<br>(40-113,520)       | 4120 [760-20,800]<br>(40-80,360)       |
| Children: 6-10 years                                           | 760 [240-1,840]<br>(40-61,560)          | 320 [120-1,280]<br>(40-73,360)      | 520 [200-2,720]<br>(40-48,600)          | 1020 [320-5,100]<br>(40-97,520)        |
| Adolescents: 11-20 years                                       | 320 [160-760]<br>(40-27,440)            | 180 [80-240]<br>(40-42,120)         | 280 [120-1,000]<br>(40-42,880)          | 440 [160-1,210]<br>(40-66,760)         |
| Adults: > 20 years                                             | 200 [120-680]<br>(40-31,040)            | 120 [80-240]<br>(40-41,320)         | 120 [40-630]<br>(40-40,280)             | 220 [80-730]<br>(40-19,040)            |

Indoor residual spraying (IRS), Seasonal malaria chemoprevention (SMC)

<sup>a</sup> Number of participants surveyed that were analysed by microscopy.

<sup>b</sup> Data reflect the number (% (n/N)) of participants surveyed in each age group.

<sup>c</sup> Data reflect the number (% (n/N)) of participants surveyed that were microscopically positive for an asymptomatic *P. falciparum* infection (including mixed *P. falciparum* infections) relative to the number of participants surveyed in the total population and by the age groups presented.

<sup>d</sup> Median parasite density (i.e., parasites/ $\mu$ L of blood) [interquartile range (IQR)] (min-max) for the microscopically positive asymptomatic *P. falciparum* infections (including mixed *P. falciparum* infections).

114 **Table supplement 2.** The DBL $\alpha$  sequence pool sizes (upsA and non-upsA) and the number of unique DBL $\alpha$  types (upsA and non-upsA)  
 115 observed in each survey (i.e., 2012, 2014, 2015, 2017) for those isolates with DBL $\alpha$  sequencing data.

116

| Survey                  | <i>P. falciparum</i> isolates sequenced | <i>P. falciparum</i> isolates with DBL $\alpha$ sequence data ( $\geq 1$ DBL $\alpha$ type) <sup>a</sup> | <i>P. falciparum</i> isolates with DBL $\alpha$ sequence data ( $\geq 20$ DBL $\alpha$ types) <sup>a</sup> | DBL $\alpha$ sequence pool size |                                          |                                              | Number of unique DBL $\alpha$ types |                                      |                                          |
|-------------------------|-----------------------------------------|----------------------------------------------------------------------------------------------------------|------------------------------------------------------------------------------------------------------------|---------------------------------|------------------------------------------|----------------------------------------------|-------------------------------------|--------------------------------------|------------------------------------------|
|                         |                                         |                                                                                                          |                                                                                                            | DBL $\alpha$ sequences          | UpsA DBL $\alpha$ sequences <sup>b</sup> | Non-upsA DBL $\alpha$ sequences <sup>c</sup> | DBL $\alpha$ types                  | UpsA DBL $\alpha$ types <sup>d</sup> | Non-upsA DBL $\alpha$ types <sup>e</sup> |
| October 2012 (pre-IRS)  | 808                                     | 742 (91.8)                                                                                               | 685 (84.8)                                                                                                 | 120,029                         | 22,881 (19.1)                            | 97,148 (80.9)                                | 35,377                              | 2,218 (6.3)                          | 33,159 (93.7)                            |
| October 2014 (IRS)      | 430                                     | 386 (89.8)                                                                                               | 301 (70.0)                                                                                                 | 33,489                          | 7,048 (21.0)                             | 26,441 (79.0)                                | 16,334                              | 1,503 (9.2)                          | 14,831 (90.8)                            |
| October 2015 (post-IRS) | 545                                     | 510 (93.6)                                                                                               | 413 (75.8)                                                                                                 | 42,774                          | 8,942 (20.9)                             | 33,832 (79.1)                                | 19,584                              | 1,673 (8.5)                          | 17,911 (91.5)                            |
| October 2017 (SMC)      | 789                                     | 759 (96.2)                                                                                               | 700 (88.7)                                                                                                 | 92,757                          | 18,625 (20.1)                            | 74,132 (79.9)                                | 29,423                              | 2,074 (7.0)                          | 27,349 (93.0)                            |
| TOTAL                   | 2,572                                   | 2,397 (93.2)                                                                                             | 2,099 (81.6)                                                                                               | 289,049                         | 57,496 (19.9)                            | 231,553 (80.1)                               | 53,238                              | 2,802 (5.3)                          | 50,436 (94.7)                            |

Indoor residual spraying (IRS), Seasonal malaria chemoprevention (SMC), Interquartile range (IQR)

<sup>a</sup> Data reflect the number (% (n/N)) of *P. falciparum* isolates that had DBL $\alpha$  sequencing data relative to the number of participants sampled that were positive for *P. falciparum* by microscopy (including mixed *P. falciparum* infections). For those a breakdown of those isolates by age group (years) with  $\geq 20$  DBL $\alpha$  types included in the analyses, see Table supplement 7.

<sup>b</sup> Data reflect the upsA DBL $\alpha$  sequence pool size (% (n/N)) relative to the DBL $\alpha$  sequence pool size.

<sup>c</sup> Data reflect the non-upsA DBL $\alpha$  sequence pool size (% (n/N)) relative to the DBL $\alpha$  sequence pool size.

<sup>d</sup> Data reflect the number (% (n/N)) of upsA DBL $\alpha$  types identified relative to the number of DBL $\alpha$  types identified.

<sup>e</sup> Data reflect the number (% (n/N)) of non-upsA DBL $\alpha$  types identified relative to the number of DBL $\alpha$  types identified.

117 **Table supplement 3.** The Kolmogorov-Smirnov Test (KS-test) is applied to compare the estimated  
 118 MOI distributions for the population in each survey (i.e., 2012, 2014, 2015, 2017) for the two  
 119 approaches, namely by pooling the maximum *a posteriori* MOI estimates or by using the mixture  
 120 distributions (see Materials and Methods) for the uniform prior.  
 121

| Survey                     | Prior   | KS-test statistics | <i>p</i> -value | Mean MOI difference <sup>a</sup> |
|----------------------------|---------|--------------------|-----------------|----------------------------------|
| October 2012<br>(pre-IRS)  | Uniform | 0.019592           | 0.955175        | -0.13235                         |
| October 2014<br>(IRS)      | Uniform | 0.030432           | 0.943197        | -0.13112                         |
| October 2015<br>(post-IRS) | Uniform | 0.038248           | 0.581476        | -0.1149                          |
| October 2017<br>(SMC)      | Uniform | 0.023823           | 0.821812        | -0.1298                          |

Indoor residual spraying (IRS), Seasonal malaria chemoprevention (SMC)

<sup>a</sup> The mean MOI difference is the difference in the mean value of the population-level MOI estimates from either pooling the maximum *a posteriori* estimates or the mixture distribution.

122 **Table supplement 4.** The Kolmogorov-Smirnov Test (KS-test) is applied to compare the estimated  
 123 MOI distributions for the population in each survey (i.e., 2012, 2014, 2015, 2017) for the two  
 124 approaches, namely by pooling the maximum *a posteriori* MOI estimates or by using the mixture  
 125 distributions (see Materials and Methods) using the negative binomial distribution with  
 126 parameters in the range typical for low- (corresponding to a mean MOI ~ 1.5), medium-  
 127 (corresponding to a mean MOI ~ 4.3), and high- (corresponding to a mean MOI ~ 6.7) transmission  
 128 endemic areas.

| Survey                     | Negative binomial | KS-test statistics | <i>p</i> -value | Mean MOI difference <sup>a</sup> |
|----------------------------|-------------------|--------------------|-----------------|----------------------------------|
| October 2012<br>(pre-IRS)  | Low               | 0.024189           | 0.817681        | -0.14031                         |
|                            | Medium            | 0.021339           | 0.914045        | -0.11099                         |
|                            | High              | 0.019512           | 0.956709        | -0.11381                         |
| October 2014<br>(IRS)      | Low               | 0.027862           | 0.973588        | -0.08387                         |
|                            | Medium            | 0.032505           | 0.908128        | -0.09739                         |
|                            | High              | 0.036612           | 0.814540        | -0.12282                         |
| October 2015<br>(post-IRS) | Low               | 0.037872           | 0.594217        | -0.09361                         |
|                            | Medium            | 0.032974           | 0.760228        | -0.11319                         |
|                            | High              | 0.037138           | 0.619209        | -0.11284                         |
| October 2017<br>(SMC)      | Low               | 0.025665           | 0.745796        | -0.10952                         |
|                            | Medium            | 0.026964           | 0.68884         | -0.12406                         |
|                            | High              | 0.030275           | 0.542523        | -0.13645                         |

Indoor residual spraying (IRS), Seasonal malaria chemoprevention (SMC)

<sup>a</sup> The mean MOI difference is the difference in the mean value of the population-level MOI estimates from either pooling the maximum *a posteriori* estimates or the mixture distribution for different parameter choices of a zero-truncated negative binomial prior.



130 **Table supplement 5.** The Kolmogorov-Smirnov Test (KS-test) and the Pearson correlation tests (PC-test) are applied to compare  
 131 the estimated MOI distributions for the population in each survey (i.e., 2012, 2014, 2015, 2017) based on either a uniform prior  
 132 or a zero-truncated negative binomial prior with parameters in the ranges typical for low- (corresponding to a mean MOI ~ 1.5),  
 133 medium- (corresponding to a mean MOI ~ 4.3), and high- (corresponding to a mean MOI ~ 6.7) transmission endemic areas (see  
 134 Materials and Methods). We present the results of comparison for both approaches which obtain the population-level MOI  
 135 distribution from individual posterior MOI distributions, namely by pooling the maximum *a posteriori* MOI estimates (i.e., MAP  
 136 pool) or by using mixture distribution (i.e., Mixture Dist.).

| Survey                     | Approach      | Comparison<br>(Negative binomial vs. Uniform) | KS-test<br>statistics | KS-test<br><i>p</i> -value | PC-test<br>statistics | PC-test<br><i>p</i> -value | Mean MOI<br>difference <sup>a</sup> |
|----------------------------|---------------|-----------------------------------------------|-----------------------|----------------------------|-----------------------|----------------------------|-------------------------------------|
| October 2012<br>(pre-IRS)  | MAP pool      | Low vs. Uniform                               | 0.054015              | 0.036738                   | 0.988473              | 0                          | -0.32117                            |
|                            | MAP pool      | Medium vs. Uniform                            | 0.018978              | 0.966014                   | 0.994902              | 0                          | -0.08029                            |
|                            | MAP pool      | High vs. Uniform                              | 0.018978              | 0.966014                   | 0.997470              | 0                          | -0.00438                            |
| October 2014<br>(IRS)      | MAP pool      | Low vs. Uniform                               | 0.036545              | 0.816283                   | 0.990630              | 1.4E-260                   | -0.13289                            |
|                            | MAP pool      | Medium vs. Uniform                            | 0.016611              | 0.999997                   | 0.996893              | 0                          | -0.00332                            |
|                            | MAP pool      | High vs. Uniform                              | 0.019934              | 0.999760                   | 0.997409              | 0                          | 0.01661                             |
| October 2015<br>(post-IRS) | MAP pool      | Low vs. Uniform                               | 0.046005              | 0.346351                   | 0.984101              | 0                          | -0.15496                            |
|                            | MAP pool      | Medium vs. Uniform                            | 0.009685              | 1                          | 0.99500               | 0                          | -0.02179                            |
|                            | MAP pool      | High vs. Uniform                              | 0.024213              | 0.968793                   | 0.996081              | 0                          | 0.01937                             |
| October 2017<br>(SMC)      | MAP pool      | Low vs. Uniform                               | 0.055714              | 0.025924                   | 0.985225              | 0                          | -0.22714                            |
|                            | MAP pool      | Medium vs. Uniform                            | 0.011429              | 0.999989                   | 0.994265              | 0                          | -0.04714                            |
|                            | MAP pool      | High vs. Uniform                              | 0.011429              | 0.999989                   | 0.996798              | 0                          | -0.00286                            |
| October 2012<br>(pre-IRS)  | Mixture Dist. | Low vs. Uniform                               | 0.05387               | 0.037968                   | -                     | -                          | -0.31321                            |
|                            | Mixture Dist. | Medium vs. Uniform                            | 0.015199              | 0.997437                   | -                     | -                          | -0.10165                            |
|                            | Mixture Dist. | High vs. Uniform                              | 0.007393              | 1                          | -                     | -                          | -0.02292                            |
| October 2014<br>(IRS)      | Mixture Dist. | Low vs. Uniform                               | 0.040398              | 0.709761                   | -                     | -                          | -0.18014                            |
|                            | Mixture Dist. | Medium vs. Uniform                            | 0.011440              | 1                          | -                     | -                          | -0.03705                            |
|                            | Mixture Dist. | High vs. Uniform                              | 0.010149              | 1                          | -                     | -                          | 0.00832                             |
| October 2015<br>(post-IRS) | Mixture Dist. | Low vs. Uniform                               | 0.049573              | 0.263382                   | -                     | -                          | -0.17625                            |
|                            | Mixture Dist. | Medium vs. Uniform                            | 0.008205              | 1                          | -                     | -                          | -0.02350                            |
|                            | Mixture Dist. | High vs. Uniform                              | 0.010618              | 1                          | -                     | -                          | 0.01732                             |
| October 2017<br>(SMC)      | Mixture Dist. | Low vs. Uniform                               | 0.048020              | 0.07961                    | -                     | -                          | -0.24742                            |
|                            | Mixture Dist. | Medium vs. Uniform                            | 0.009626              | 1                          | -                     | -                          | -0.05289                            |
|                            | Mixture Dist. | High vs. Uniform                              | 0.009381              | 1                          | -                     | -                          | 0.00379                             |

Indoor residual spraying (IRS), Seasonal malaria chemoprevention (SMC), NA (-)

<sup>a</sup> The mean MOI difference is the difference in the mean value of the population-level MOI estimates from assuming either a zero-truncated negative binomial prior with different parameter choices, or a uniform prior. Take the first row of the table as an example, the mean MOI difference value (-0.32117) is equal to the mean MOI for the population based on a zero-truncated negative binomial prior with a low-transmission parameter choice minus that based on a uniform prior. The order of comparison is consistent with the one listed in the Comparison column (Low vs. Uniform).

137 **Table supplement 6.** The Kolmogorov-Smirnov Test (KS-test) and the Pearson correlation tests (PC-test) are applied to compare  
 138 the estimated MOI distributions for the population in each survey (i.e., 2012, 2014, 2015, 2017) between the zero-truncated  
 139 negative binomial priors with parameters in the ranges typical for low- (corresponding to a mean MOI ~ 1.5), medium-  
 140 (corresponding to a mean MOI ~ 4.3), and high- (corresponding to a mean MOI ~ 6.7) transmission endemic areas (see Materials  
 141 and Methods). We present the results of comparison for both approaches which obtain the population-level MOI distribution from  
 142 individual posterior MOI distributions, namely by pooling the maximum *a posteriori* MOI estimates (i.e., MAP pool) or by using  
 143 mixture distribution (i.e., Mixture Dist.).  
 144

| Survey                  | Approach      | Comparison (Negative binomial) | KS-test statistics | KS-test <i>p-value</i> | PC-test statistics | PC-test <i>p-value</i> | Mean MOI difference <sup>a</sup> |
|-------------------------|---------------|--------------------------------|--------------------|------------------------|--------------------|------------------------|----------------------------------|
| October 2012 (pre-IRS)  | MAP pool      | Medium vs. Low                 | 0.051095           | 0.055938               | 0.986680           | 0                      | 0.240876                         |
|                         | MAP pool      | Medium vs. High                | 0.014599           | 0.998598               | 0.996125           | 0                      | -0.075912                        |
|                         | MAP pool      | Low vs. High                   | 0.055474           | 0.029513               | 0.986516           | 0                      | -0.316788                        |
| October 2014 (IRS)      | MAP pool      | Medium vs. Low                 | 0.053156           | 0.362791               | 0.989269           | 8.011E-252             | 0.129568                         |
|                         | MAP pool      | Medium vs. High                | 0.003322           | 1                      | 0.998276           | 0                      | -0.019934                        |
|                         | MAP pool      | Low vs. High                   | 0.056478           | 0.292237               | 0.988379           | 1.112E-246             | -0.149502                        |
| October 2015 (post-IRS) | MAP pool      | Medium vs. Low                 | 0.055690           | 0.154269               | 0.981405           | 9.764E-297             | 0.133172                         |
|                         | MAP pool      | Medium vs. High                | 0.014528           | 0.999994               | 0.994613           | 0                      | -0.041162                        |
|                         | MAP pool      | Low vs. High                   | 0.070218           | 0.034065               | 0.979963           | 3.920E-290             | -0.174334                        |
| October 2017 (SMC)      | MAP pool      | Medium vs. Low                 | 0.044286           | 0.128371               | 0.983760           | 0                      | 0.18                             |
|                         | MAP pool      | Medium vs. High                | 0.011429           | 0.999989               | 0.995738           | 0                      | -0.044286                        |
|                         | MAP pool      | Low vs. High                   | 0.055714           | 0.025924               | 0.982745           | 0                      | -0.224286                        |
| October 2012 (pre-IRS)  | Mixture Dist. | Medium vs. Low                 | 0.040399           | 0.214223               | -                  | -                      | 0.211562                         |
|                         | Mixture Dist. | Medium vs. High                | 0.011531           | 0.999989               | -                  | -                      | -0.078734                        |
|                         | Mixture Dist. | Low vs. High                   | 0.052049           | 0.049412               | -                  | -                      | -0.290295                        |
| October 2014 (IRS)      | Mixture Dist. | Medium vs. Low                 | 0.037816           | 0.785935               | -                  | -                      | 0.143090                         |
|                         | Mixture Dist. | Medium vs. High                | 0.011447           | 1                      | -                  | -                      | -0.045364                        |
|                         | Mixture Dist. | Low vs. High                   | 0.050535           | 0.425625               | -                  | -                      | -0.188454                        |
| October 2015 (post-IRS) | Mixture Dist. | Medium vs. Low                 | 0.047779           | 0.303800               | -                  | -                      | 0.152752                         |
|                         | Mixture Dist. | Medium vs. High                | 0.010639           | 1                      | -                  | -                      | -0.040816                        |
|                         | Mixture Dist. | Low vs. High                   | 0.061610           | 0.087626               | -                  | -                      | -0.193568                        |
| October 2017 (SMC)      | Mixture Dist. | Medium vs. Low                 | 0.042425           | 0.161444               | -                  | -                      | 0.194537                         |
|                         | Mixture Dist. | Medium vs. High                | 0.0096285          | 0.999999               | -                  | -                      | -0.056674                        |
|                         | Mixture Dist. | Low vs. High                   | 0.052140           | 0.044719               | -                  | -                      | -0.251211                        |

Indoor residual spraying (IRS), Seasonal malaria chemoprevention (SMC), NA (-)

<sup>a</sup> The mean MOI difference is the difference in the mean value of the population-level MOI estimates from assuming zero-truncated negative binomial priors with different parameter choices. Take the first row of the table as an example, the mean MOI difference value (0.240876) is equal to the mean MOI for the population based on a zero-truncated negative binomial prior with a medium-transmission parameter choice minus that based on a zero-truncated negative binomial prior with a low-transmission parameter choice. The order of comparison is consistent with the one listed in the Comparison column (Medium vs. Low).

145 **Table supplement 7.** Microscopic *P. falciparum* DBL $\alpha$  type sequencing results, number of *P.*  
 146 *falciparum* var repertoires (i.e., census population size), and mean MOI<sub>var</sub> by age group (years) in  
 147 each survey (i.e., 2012, 2014, 2015, 2017).

|                                                                                                                                                    | October 2012<br>(pre-IRS)     | October 2014<br>(IRS)         | October 2015<br>(post-IRS)    | October 2017<br>(SMC)         |
|----------------------------------------------------------------------------------------------------------------------------------------------------|-------------------------------|-------------------------------|-------------------------------|-------------------------------|
| <b>Number of microscopic <i>P. falciparum</i> isolates</b>                                                                                         | <b>808</b>                    | <b>430</b>                    | <b>545</b>                    | <b>789</b>                    |
| <b><i>P. falciparum</i> isolates with DBL<math>\alpha</math> sequencing data (<math>\geq 20</math> DBL<math>\alpha</math> types) <sup>a*</sup></b> | <b>685 (84.8)</b>             | <b>301 (70.0)</b>             | <b>413 (75.8)</b>             | <b>700 (88.7)</b>             |
| Children: 1-5 years                                                                                                                                | 158 (91.3)                    | 28 (75.7)                     | 51 (81.0)                     | 44 (89.8)                     |
| Children: 6-10 years                                                                                                                               | 217 (89.3)                    | 116 (81.7)                    | 146 (87.4)                    | 170 (92.4)                    |
| Adolescents: 11-20 years                                                                                                                           | 167 (82.7)                    | 112 (69.1)                    | 129 (76.3)                    | 284 (93.4)                    |
| Adults: >20 years                                                                                                                                  | 143 (75.3)                    | 45 (50.6)                     | 87 (59.6)                     | 202 (68.5)                    |
| <b>Number of <i>P. falciparum</i> var repertoires (i.e., census population size) <sup>b*</sup></b>                                                 | <b>3001<br/>(2848 - 3157)</b> | <b>825<br/>(748 - 910)</b>    | <b>1063<br/>(991 - 1142)</b>  | <b>2297<br/>(2183 - 2415)</b> |
| Children: 1-5 years                                                                                                                                | 816<br>(739 - 896)            | 80<br>(54-113)                | 116<br>(101 - 132)            | 147<br>(120 - 178)            |
| Children: 6-10 years                                                                                                                               | 1142<br>(1057 - 1231)         | 374<br>(320 - 431)            | 432<br>(385 - 484)            | 750<br>(680 - 822)            |
| Adolescents: 11-20 years                                                                                                                           | 683<br>(614 - 755)            | 290<br>(252 - 332)            | 354<br>(309 - 402)            | 980<br>(911 - 1051)           |
| Adults: >20 years                                                                                                                                  | 360<br>(325 - 397)            | 81<br>(62 - 107)              | 161<br>(141 - 184)            | 420<br>(390 - 452)            |
| <b><i>P. falciparum</i> mean MOI<sub>var</sub> <sup>c*</sup></b>                                                                                   | <b>4.38<br/>(4.16 - 4.61)</b> | <b>2.74<br/>(2.49 - 3.02)</b> | <b>2.57<br/>(2.40 - 2.77)</b> | <b>3.28<br/>(3.12 - 4.45)</b> |
| Children: 1-5 years                                                                                                                                | 5.16<br>(4.68 - 5.67)         | 2.86<br>(1.93 - 4.04)         | 2.27<br>(1.98 - 2.59)         | 3.34<br>(2.73 - 4.05)         |
| Children: 6-10 years                                                                                                                               | 5.26<br>(4.87 - 5.67)         | 3.22<br>(2.76 - 3.72)         | 2.96<br>(2.64 - 3.32)         | 4.41<br>(4.00 - 4.84)         |
| Adolescents: 11-20 years                                                                                                                           | 4.09<br>(3.68 - 4.52)         | 2.59<br>(2.25 - 2.96)         | 2.74<br>(2.40 - 3.12)         | 3.45<br>(3.21 - 3.70)         |
| Adults: >20 years                                                                                                                                  | 2.52<br>(2.27 - 2.78)         | 1.80<br>(1.38 -2.38)          | 1.85<br>(1.62 - 2.11)         | 2.08<br>(1.93 - 2.24)         |

<sup>a</sup> Data reflect the number (% (n/N)) of *P. falciparum* isolates that had DBL $\alpha$  sequencing data relative to the number of participants sampled that were positive for *P. falciparum* by microscopy (including mixed *P. falciparum* infections) in the total population and by the age groups (see Table 1 for total number of participants sampled that were microscopy positive).

<sup>b</sup> Number of var repertoires (i.e., census population size) (95% confidence interval) estimated by summation of isolate MOI<sub>var</sub> based on pooling the maximum *a posteriori* MOI estimates.

<sup>c</sup> Mean MOI<sub>var</sub> (95% confidence interval) based on pooling the maximum *a posteriori* MOI estimates.

The 95% confidence intervals (95% CIs) were calculated based on a bootstrap approach. We resampled 10,000 replicates from the original population-level MOI distribution with replacement. Each resampled replicate has the same size as the original sample. We then derive the 95% CI based on the distribution of the resampled replicates.

\* Note: There is a simple map between census population size and mean MOI, as one can simply divide or multiply by the sample size (i.e., the number of *P. falciparum* isolates with DBL $\alpha$  sequencing data), respectively, to convert between the two quantities.

148  
149

## 150 SUPPLEMENTAL REFERENCES

- 151 Bull PC, Berriman M, Kyes S, Quail MA, Hall N, Kortok MM, Marsh K, Newbold CI. 2005.  
152 Plasmodium falciparum variant surface antigen expression patterns during malaria. *PLoS*  
153 *Pathog* **1**:0202–0213. doi:10.1371/journal.ppat.0010026
- 154 Ghansah A, Tiedje KE, Argyropoulos DC, Onwona CO, Deed SL, Labbé F, Oduro AR, Koram KA,  
155 Pascual M, Day KP. 2023. Comparison of molecular surveillance methods to assess changes  
156 in the population genetics of Plasmodium falciparum in high transmission. *Frontiers in*  
157 *Parasitology* **2**:1067966. doi:doi: 10.3389/fpara.2023.1067966
- 158 He Q, Pilosof S, Tiedje KE, Ruybal-Pesántez S, Artzy-Randrup Y, Baskerville EB, Day KP, Pascual M.  
159 2018. Networks of genetic similarity reveal non-neutral processes shape strain structure in  
160 Plasmodium falciparum. *Nat Commun* **9**:1817. doi:10.1038/s41467-018-04219-3
- 161 Labbé F, He Q, Zhan Q, Tiedje KE, Argyropoulos DC, Tan MH, Ghansah A, Day KP, Pascual M.  
162 2023. Neutral vs . non-neutral genetic footprints of Plasmodium falciparum multiclonal  
163 infections. *PLoS Comput Biol* **19**:e1010816. doi:doi.org/10.1101/2022.06.27.497801
- 164 Pilosof S, He Q, Tiedje KE, Ruybal-Pesántez S, Day KP, Pascual M. 2019. Competition for hosts  
165 modulates vast antigenic diversity to generate persistent strain structure in Plasmodium  
166 falciparum. *PLoS Biol* **17**:e3000336. doi:10.1371/journal.pbio.3000336
- 167 Rask TS, Hansen D, Theander TG, Pedersen AG, Lavstsen T, Gorm Pedersen A, Lavstsen T,  
168 Pedersen AG, Lavstsen T, Gorm Pedersen A, Lavstsen T. 2010. Plasmodium falciparum  
169 erythrocyte membrane protein 1 diversity in seven genomes - divide and conquer. *PLoS*  
170 *Comput Biol* **6**:e1000933. doi:10.1371/journal.pcbi.1000933
- 171 Rask TS, Petersen B, Chen DS, Day KP, Pedersen AG. 2016. Using expected sequence features to  
172 improve basecalling accuracy of amplicon pyrosequencing data. *BMC Bioinformatics* **17**:176.  
173 doi:10.1186/s12859-016-1032-7
- 174 Roche. 2009. Using multiplex identifier (MID) adaptors for the GS FLX titanium chemistry-  
175 Extended MID set. *Technical Bulletin: Genome Sequencer FLX System TCB No 005*.
- 176 Ruybal-Pesántez S, Tiedje KE, Pilosof S, Tonkin-Hill G, He Q, Rask TS, Amenga-Etego L, Oduro AR,  
177 Koram KA, Pascual M, Day KP. 2022. Age-specific patterns of DBLa var diversity can explain  
178 why residents of high malaria transmission areas remain susceptible to Plasmodium  
179 falciparum blood stage infection throughout life. *Int J Parasitol* **20**:721–731.
- 180 Tiedje KE, Oduro AR, Bangre O, Amenga-Etego L, Dadzie SK, Appawu MA, Frempong K, Asoala V,  
181 Charles A Narh, Samantha L Deed, Ruybal-Pesántez S, Argyropoulos DC, Anita Ghansah,  
182 Agyei SA, Segbaya S, Desewu K, Williams I, Simpson JA, Malm K, Pascual M, Koram KA, Day  
183 KP. 2022. Indoor residual spraying with a non-pyrethroid insecticide reduces the reservoir of  
184 Plasmodium falciparum in a high-transmission area in northern Ghana. *PLOS Global Public*  
185 *Health* **2**:e0000285. doi:10.1371/journal.pgph.0000285  
186
